# Supplementary material for: Proteome-wide mapping of PQS-interacting proteins in Pseudomonas aeruginosa
Source: Chem Sci. 2018 Jan 19;9(8):2290–4. doi: 10.1039/c7sc04287f (PMC5897874; doi:10.1039/c7sc04287f)
Supplement: Supplementary file 2 [file SC-009-C7SC04287F-s002.xlsx]

## Sheet: raw_data
Protein IDs	Fasta headers	Mol. weight [kDa]	Score	iBAQ	Peptides DMSO	Sequence coverage rambabu_DMSO [%]	iBAQ DMSO	Peptides 2	Sequence coverage 2 [%]	iBAQ 2	Peptides 3	Sequence coverage 3 [%]	iBAQ 3	Peptides 1	Sequence coverage 1 [%]	iBAQ 1
E1JGJ8;P0C348	tr|E1JGJ8|E1JGJ8_PSEAE Peptide chain release factor 2 OS=Pseudomonas aeruginosa (strain ATCC 15692 / DSM 22644 / CIP 104116 / JCM 14847 / LMG 12228 / 1C / PRS 101 / PAO1) GN=prfB PE=3 SV=1;sp|P0C348|RF2_PSEAE Peptide chain release factor 2 OS=Pseudomonas a	41.17	2.9786	2350900	0	0	0	1	4.4	53142	1	4.4	7719.4	2	8.8	2153100
G3XCT6	tr|G3XCT6|G3XCT6_PSEAE Probable two-component sensor OS=Pseudomonas aeruginosa (strain ATCC 15692 / DSM 22644 / CIP 104116 / JCM 14847 / LMG 12228 / 1C / PRS 101 / PAO1) GN=PA1458 PE=4 SV=1	79.737	5.9926	220400	0	0	0	3	6.1	82802	1	2.3	6977.5	3	6.1	49660
G3XCU6	tr|G3XCU6|G3XCU6_PSEAE Transcriptional regulator CysB OS=Pseudomonas aeruginosa (strain ATCC 15692 / DSM 22644 / CIP 104116 / JCM 14847 / LMG 12228 / 1C / PRS 101 / PAO1) GN=cysB PE=4 SV=1	36.109	3.175	927940	1	4	12983	1	3.7	114680	1	3.7	65130	2	7.7	548740
G3XCV0	tr|G3XCV0|G3XCV0_PSEAE Transcriptional regulator FleQ OS=Pseudomonas aeruginosa (strain ATCC 15692 / DSM 22644 / CIP 104116 / JCM 14847 / LMG 12228 / 1C / PRS 101 / PAO1) GN=fleQ PE=1 SV=1	55.276	5.1117	2407200	0	0	0	3	10.6	1132800	1	5.3	53234	3	10.6	1187000
G3XCV2	tr|G3XCV2|G3XCV2_PSEAE Dihydroaeruginoic acid synthetase OS=Pseudomonas aeruginosa (strain ATCC 15692 / DSM 22644 / CIP 104116 / JCM 14847 / LMG 12228 / 1C / PRS 101 / PAO1) GN=pchE PE=4 SV=1	156.42	1.5728	63164	0	0	0	1	1.5	25146	0	0	0	1	1.5	38018
G3XCZ6	tr|G3XCZ6|G3XCZ6_PSEAE Malonyl CoA-acyl carrier protein transacylase OS=Pseudomonas aeruginosa (strain ATCC 15692 / DSM 22644 / CIP 104116 / JCM 14847 / LMG 12228 / 1C / PRS 101 / PAO1) GN=fabD PE=3 SV=1	32.444	2.0402	2177800	0	0	0	1	6.4	644630	0	0	0	2	9.9	1533200
G3XD01	sp|G3XD01|WBPD_PSEAE UDP-2-acetamido-3-amino-2,3-dideoxy-D-glucuronate N-acetyltransferase OS=Pseudomonas aeruginosa (strain ATCC 15692 / DSM 22644 / CIP 104116 / JCM 14847 / LMG 12228 / 1C / PRS 101 / PAO1) GN=wbpD PE=1 SV=1	20.562	5.7943	2303600	1	8.4	45515	1	11	439810	0	0	0	2	19.4	1818300
G3XD11	tr|G3XD11|G3XD11_PSEAE PhoP/Q and low Mg2+ inducible outer membrane protein H1 OS=Pseudomonas aeruginosa (strain ATCC 15692 / DSM 22644 / CIP 104116 / JCM 14847 / LMG 12228 / 1C / PRS 101 / PAO1) GN=oprH PE=4 SV=1	21.574	112.8	38452000	0	0	0	5	39.5	7890100	4	29	3480700	5	39.5	13749000
G3XD12	sp|G3XD12|HCNC_PSEAE Hydrogen cyanide synthase subunit HcnC OS=Pseudomonas aeruginosa (strain ATCC 15692 / DSM 22644 / CIP 104116 / JCM 14847 / LMG 12228 / 1C / PRS 101 / PAO1) GN=hcnC PE=1 SV=1	45.281	24.608	1643100	0	0	0	1	3.6	607170	0	0	0	1	3.6	860780
G3XD20	tr|G3XD20|G3XD20_PSEAE Serine protease MucD OS=Pseudomonas aeruginosa (strain ATCC 15692 / DSM 22644 / CIP 104116 / JCM 14847 / LMG 12228 / 1C / PRS 101 / PAO1) GN=mucD PE=4 SV=1	50.321	3.2919	1091700	0	0	0	2	8	284120	2	8	253390	2	8	315490
G3XD23	sp|G3XD23|WBPB_PSEAE UDP-N-acetyl-2-amino-2-deoxy-D-glucuronate oxidase OS=Pseudomonas aeruginosa (strain ATCC 15692 / DSM 22644 / CIP 104116 / JCM 14847 / LMG 12228 / 1C / PRS 101 / PAO1) GN=wbpB PE=1 SV=1	35.717	21.675	11060000	0	0	0	5	25.3	2994200	3	13.9	562170	6	28.8	6207500
G3XD35	tr|G3XD35|G3XD35_PSEAE Heptosyltransferase II OS=Pseudomonas aeruginosa (strain ATCC 15692 / DSM 22644 / CIP 104116 / JCM 14847 / LMG 12228 / 1C / PRS 101 / PAO1) GN=waaF PE=4 SV=1	38.409	-2	236640	0	0	0	0	0	0	0	0	0	0	0	0
G3XD40	tr|G3XD40|G3XD40_PSEAE Probable acyl-CoA thiolase OS=Pseudomonas aeruginosa (strain ATCC 15692 / DSM 22644 / CIP 104116 / JCM 14847 / LMG 12228 / 1C / PRS 101 / PAO1) GN=PA3925 PE=3 SV=1	40.553	2.1663	788860	0	0	0	2	12.3	371210	0	0	0	2	12.3	417650
G3XD61	sp|G3XD61|WBPI_PSEAE UDP-2,3-diacetamido-2,3-dideoxy-D-glucuronate 2-epimerase OS=Pseudomonas aeruginosa (strain ATCC 15692 / DSM 22644 / CIP 104116 / JCM 14847 / LMG 12228 / 1C / PRS 101 / PAO1) GN=wbpI PE=1 SV=1	38.907	37.051	6090300	1	5.4	11022	5	25.1	2530400	1	5.6	128180	5	25.1	2875000
G3XD72	tr|G3XD72|G3XD72_PSEAE Probable purine-binding chemotaxis protein OS=Pseudomonas aeruginosa (strain ATCC 15692 / DSM 22644 / CIP 104116 / JCM 14847 / LMG 12228 / 1C / PRS 101 / PAO1) GN=PA1464 PE=4 SV=1	17.536	18.582	116260	0	0	0	1	10.7	23557	0	0	0	1	10.7	92701
G3XD74	tr|G3XD74|G3XD74_PSEAE D-ala-D-ala-carboxypeptidase OS=Pseudomonas aeruginosa (strain ATCC 15692 / DSM 22644 / CIP 104116 / JCM 14847 / LMG 12228 / 1C / PRS 101 / PAO1) GN=dacC PE=3 SV=1	42.457	1.638	1627700	0	0	0	1	3.9	410880	0	0	0	1	3.9	917340
G3XD89	tr|G3XD89|G3XD89_PSEAE Putative copper transport outer membrane porin OprC OS=Pseudomonas aeruginosa (strain ATCC 15692 / DSM 22644 / CIP 104116 / JCM 14847 / LMG 12228 / 1C / PRS 101 / PAO1) GN=oprC PE=3 SV=1	79.303	2.9409	417440	0	0	0	2	4.6	118270	1	3	9120.7	2	4.6	240500
G3XD94	sp|G3XD94|UGND_PSEAE UDP-N-acetyl-D-glucosamine 6-dehydrogenase OS=Pseudomonas aeruginosa (strain ATCC 15692 / DSM 22644 / CIP 104116 / JCM 14847 / LMG 12228 / 1C / PRS 101 / PAO1) GN=wbpA PE=1 SV=1	48.155	18.743	3223300	0	0	0	6	20.4	1209700	1	2.1	46321	6	20.4	1640100
G3XDB0	tr|G3XDB0|G3XDB0_PSEAE Catabolite repression control protein OS=Pseudomonas aeruginosa (strain ATCC 15692 / DSM 22644 / CIP 104116 / JCM 14847 / LMG 12228 / 1C / PRS 101 / PAO1) GN=crc PE=4 SV=1	29.844	1.3548	731090	0	0	0	1	5.8	211380	0	0	0	1	5.8	416150
O30508	sp|O30508|ARUC_PSEAE Succinylornithine transaminase/acetylornithine aminotransferase OS=Pseudomonas aeruginosa (strain ATCC 15692 / DSM 22644 / CIP 104116 / JCM 14847 / LMG 12228 / 1C / PRS 101 / PAO1) GN=aruC PE=1 SV=2	43.747	15.75	2904000	1	3.7	7997.3	3	12.6	825050	2	7.9	102760	3	12.6	1319800
O50175	sp|O50175|ASTB_PSEAE N-succinylarginine dihydrolase OS=Pseudomonas aeruginosa (strain ATCC 15692 / DSM 22644 / CIP 104116 / JCM 14847 / LMG 12228 / 1C / PRS 101 / PAO1) GN=astB PE=3 SV=1	48.874	1.3962	5977600	0	0	0	2	6.5	1293300	1	4	641440	2	6.5	2148800
O52759	sp|O52759|RS4_PSEAE 30S ribosomal protein S4 OS=Pseudomonas aeruginosa (strain ATCC 15692 / DSM 22644 / CIP 104116 / JCM 14847 / LMG 12228 / 1C / PRS 101 / PAO1) GN=rpsD PE=3 SV=2	23.277	40.902	10267000	1	8.7	23088	3	18	1535200	2	12.6	419520	3	18	5295000
O52760	sp|O52760|RPOA_PSEAE DNA-directed RNA polymerase subunit alpha OS=Pseudomonas aeruginosa (strain ATCC 15692 / DSM 22644 / CIP 104116 / JCM 14847 / LMG 12228 / 1C / PRS 101 / PAO1) GN=rpoA PE=3 SV=2	36.649	13.544	8985000	0	0	0	7	19.5	2153600	5	15.9	433290	7	19.5	3616400
O52761	sp|O52761|RL17_PSEAE 50S ribosomal protein L17 OS=Pseudomonas aeruginosa (strain ATCC 15692 / DSM 22644 / CIP 104116 / JCM 14847 / LMG 12228 / 1C / PRS 101 / PAO1) GN=rplQ PE=3 SV=1	14.504	1.738	9297200	0	0	0	2	20.9	2292300	1	7.8	179840	2	20.9	4540500
O52762	sp|O52762|CATA_PSEAE Catalase OS=Pseudomonas aeruginosa (strain ATCC 15692 / DSM 22644 / CIP 104116 / JCM 14847 / LMG 12228 / 1C / PRS 101 / PAO1) GN=katA PE=1 SV=1	55.588	146	24909000	0	0	0	14	46.1	8450900	14	46.1	2221800	14	46.1	7791900
O54438	sp|O54438|FABG_PSEAE 3-oxoacyl-[acyl-carrier-protein] reductase FabG OS=Pseudomonas aeruginosa (strain ATCC 15692 / DSM 22644 / CIP 104116 / JCM 14847 / LMG 12228 / 1C / PRS 101 / PAO1) GN=fabG PE=1 SV=1	25.585	1.9643	1181100	1	6.9	6596.6	2	11.7	581090	1	4.9	237220	1	6.9	356180
O54439	sp|O54439|ACP1_PSEAE Acyl carrier protein 1 OS=Pseudomonas aeruginosa (strain ATCC 15692 / DSM 22644 / CIP 104116 / JCM 14847 / LMG 12228 / 1C / PRS 101 / PAO1) GN=acpP1 PE=3 SV=4	8.7406	12.226	53839000	0	0	0	1	20.5	24267000	1	20.5	11221000	1	20.5	12216000
O68822	sp|O68822|AMPA_PSEAE Cytosol aminopeptidase OS=Pseudomonas aeruginosa (strain ATCC 15692 / DSM 22644 / CIP 104116 / JCM 14847 / LMG 12228 / 1C / PRS 101 / PAO1) GN=pepA PE=3 SV=1	52.331	4.1655	43954	0	0	0	0	0	0	1	3	43954	0	0	0
O69077	sp|O69077|AK_PSEAE Aspartokinase OS=Pseudomonas aeruginosa (strain ATCC 15692 / DSM 22644 / CIP 104116 / JCM 14847 / LMG 12228 / 1C / PRS 101 / PAO1) GN=lysC PE=3 SV=2	44.388	2.9349	372240	0	0	0	2	6.3	252950	0	0	0	1	3.6	119300
O69753	sp|O69753|PHZB1_PSEAE Phenazine biosynthesis protein PhzB 1 OS=Pseudomonas aeruginosa (strain ATCC 15692 / DSM 22644 / CIP 104116 / JCM 14847 / LMG 12228 / 1C / PRS 101 / PAO1) GN=phzB1 PE=3 SV=1	18.888	7.5317	2558100	1	14.8	0	2	24.7	636740	1	9.9	139140	2	24.7	1384900
O69754	sp|O69754|PHZF_PSEAE Trans-2,3-dihydro-3-hydroxyanthranilate isomerase OS=Pseudomonas aeruginosa (strain ATCC 15692 / DSM 22644 / CIP 104116 / JCM 14847 / LMG 12228 / 1C / PRS 101 / PAO1) GN=phzF1 PE=3 SV=2	30.342	2.739	2303500	1	6.1	4652.3	1	10.8	1163400	0	0	0	1	10.8	1135500
O82850	sp|O82850|RS2_PSEAE 30S ribosomal protein S2 OS=Pseudomonas aeruginosa (strain ATCC 15692 / DSM 22644 / CIP 104116 / JCM 14847 / LMG 12228 / 1C / PRS 101 / PAO1) GN=rpsB PE=3 SV=2	27.336	23.669	23616000	1	6.1	67909	6	35.4	7355300	3	17.1	573170	6	35.4	12770000
O82851	sp|O82851|EFTS_PSEAE Elongation factor Ts OS=Pseudomonas aeruginosa (strain ATCC 15692 / DSM 22644 / CIP 104116 / JCM 14847 / LMG 12228 / 1C / PRS 101 / PAO1) GN=tsf PE=3 SV=1	30.653	3.7511	2631700	1	4.5	6922.6	3	13.1	655850	1	3.8	0	3	13.1	1604900
O82853	sp|O82853|RRF_PSEAE Ribosome-recycling factor OS=Pseudomonas aeruginosa (strain ATCC 15692 / DSM 22644 / CIP 104116 / JCM 14847 / LMG 12228 / 1C / PRS 101 / PAO1) GN=frr PE=3 SV=1	20.485	5.7678	1290500	0	0	0	0	0	0	3	26.5	1080000	1	10.3	210460
O86428	sp|O86428|ILVE_PSEAE Branched-chain-amino-acid aminotransferase OS=Pseudomonas aeruginosa (strain ATCC 15692 / DSM 22644 / CIP 104116 / JCM 14847 / LMG 12228 / 1C / PRS 101 / PAO1) GN=ilvE PE=1 SV=2	34.084	13.676	8756200	1	8.1	15278	5	29.6	2661000	2	8.1	330310	4	21.5	3817400
P04739	sp|P04739|FMPO_PSEAE Fimbrial protein OS=Pseudomonas aeruginosa (strain ATCC 15692 / DSM 22644 / CIP 104116 / JCM 14847 / LMG 12228 / 1C / PRS 101 / PAO1) GN=pilA PE=1 SV=1	15.512	21.281	9441500	1	14.1	30760	2	23.5	2866000	1	9.4	912670	1	9.4	3039000
P05384	sp|P05384|DBHB_PSEAE DNA-binding protein HU-beta OS=Pseudomonas aeruginosa (strain ATCC 15692 / DSM 22644 / CIP 104116 / JCM 14847 / LMG 12228 / 1C / PRS 101 / PAO1) GN=hupB PE=1 SV=3	9.0865	29.497	130600000	1	17.8	365600	2	32.2	66943000	3	50	27902000	2	32.2	19420000
P07345	sp|P07345|TRPB_PSEAE Tryptophan synthase beta chain OS=Pseudomonas aeruginosa (strain ATCC 15692 / DSM 22644 / CIP 104116 / JCM 14847 / LMG 12228 / 1C / PRS 101 / PAO1) GN=trpB PE=3 SV=2	43.68	1.3306	149800	0	0	0	1	4.7	75804	0	0	0	1	4.7	73997
P08280	sp|P08280|RECA_PSEAE Protein RecA OS=Pseudomonas aeruginosa (strain ATCC 15692 / DSM 22644 / CIP 104116 / JCM 14847 / LMG 12228 / 1C / PRS 101 / PAO1) GN=recA PE=3 SV=1	36.879	7.5365	1549600	1	4.6	15207	3	11.8	410860	0	0	0	3	11.8	1013200
P08308	sp|P08308|OTCC_PSEAE Ornithine carbamoyltransferase, catabolic OS=Pseudomonas aeruginosa (strain ATCC 15692 / DSM 22644 / CIP 104116 / JCM 14847 / LMG 12228 / 1C / PRS 101 / PAO1) GN=arcB PE=1 SV=3	38.108	40.244	53345000	3	17.3	42587	14	52.4	14190000	13	54.8	4308000	12	50	23179000
P09591	sp|P09591|EFTU_PSEAE Elongation factor Tu OS=Pseudomonas aeruginosa (strain ATCC 15692 / DSM 22644 / CIP 104116 / JCM 14847 / LMG 12228 / 1C / PRS 101 / PAO1) GN=tufA PE=1 SV=2	43.369	150.82	363520000	11	41.1	311100	20	73.3	118440000	19	68.3	20843000	21	75.6	132250000
P13794	sp|P13794|PORF_PSEAE Outer membrane porin F OS=Pseudomonas aeruginosa (strain ATCC 15692 / DSM 22644 / CIP 104116 / JCM 14847 / LMG 12228 / 1C / PRS 101 / PAO1) GN=oprF PE=1 SV=1	37.639	29.8	27129000	2	11.7	49679	9	37.1	4772000	5	22.3	1367400	9	37.1	13139000
P13981	sp|P13981|ARCA_PSEAE Arginine deiminase OS=Pseudomonas aeruginosa (strain ATCC 15692 / DSM 22644 / CIP 104116 / JCM 14847 / LMG 12228 / 1C / PRS 101 / PAO1) GN=arcA PE=1 SV=2	46.435	193.27	112760000	8	26.8	100980	24	71.5	29197000	18	53.1	5961400	26	74.6	51178000
P13982	sp|P13982|ARCC_PSEAE Carbamate kinase OS=Pseudomonas aeruginosa (strain ATCC 15692 / DSM 22644 / CIP 104116 / JCM 14847 / LMG 12228 / 1C / PRS 101 / PAO1) GN=arcC PE=3 SV=1	33.08	36.473	17938000	2	6.8	40321	7	40.3	5793000	6	29	1027300	6	29	8520700
P14165	sp|P14165|CISY_PSEAE Citrate synthase OS=Pseudomonas aeruginosa (strain ATCC 15692 / DSM 22644 / CIP 104116 / JCM 14847 / LMG 12228 / 1C / PRS 101 / PAO1) GN=gltA PE=3 SV=2	47.694	84.062	16523000	1	3.5	31778	10	46.5	5270800	4	17.8	287330	11	48.8	9279300
P14532	sp|P14532|CCPR_PSEAE Cytochrome c551 peroxidase OS=Pseudomonas aeruginosa (strain ATCC 15692 / DSM 22644 / CIP 104116 / JCM 14847 / LMG 12228 / 1C / PRS 101 / PAO1) GN=ccpA PE=1 SV=2	37.403	3.3212	5116500	0	0	0	2	11	2104600	1	5.8	149810	2	11	2403700
P15276	sp|P15276|ALGP_PSEAE Transcriptional regulatory protein AlgP OS=Pseudomonas aeruginosa (strain ATCC 15692 / DSM 22644 / CIP 104116 / JCM 14847 / LMG 12228 / 1C / PRS 101 / PAO1) GN=algP PE=4 SV=2	34.49	27.695	13888000	0	0	0	1	4.5	2273800	1	4	487920	2	4.5	7209300
P19572	sp|P19572|DCDA_PSEAE Diaminopimelate decarboxylase OS=Pseudomonas aeruginosa (strain ATCC 15692 / DSM 22644 / CIP 104116 / JCM 14847 / LMG 12228 / 1C / PRS 101 / PAO1) GN=lysA PE=3 SV=2	45.49	2.1216	175820	1	3.4	5486.2	1	3.6	25166	0	0	0	1	3.6	145170
P20580	sp|P20580|TRPE_PSEAE Anthranilate synthase component 1 OS=Pseudomonas aeruginosa (strain ATCC 15692 / DSM 22644 / CIP 104116 / JCM 14847 / LMG 12228 / 1C / PRS 101 / PAO1) GN=trpE PE=1 SV=1	54.555	2.9323	75545	0	0	0	1	6.5	48009	0	0	0	1	6.5	27536
P20582	sp|P20582|PQSD_PSEAE 2-heptyl-4(1H)-quinolone synthase PqsD OS=Pseudomonas aeruginosa (strain ATCC 15692 / DSM 22644 / CIP 104116 / JCM 14847 / LMG 12228 / 1C / PRS 101 / PAO1) GN=pqsD PE=1 SV=2	36.378	14.973	2782900	2	13.9	25458	3	16.3	812920	0	0	0	4	19	1944500
P24474	sp|P24474|NIRS_PSEAE Nitrite reductase OS=Pseudomonas aeruginosa (strain ATCC 15692 / DSM 22644 / CIP 104116 / JCM 14847 / LMG 12228 / 1C / PRS 101 / PAO1) GN=nirS PE=1 SV=1	62.653	7.1627	711040	1	2.6	5294.4	1	1.9	102130	0	0	0	3	8.1	603610
P26275	sp|P26275|ALGR_PSEAE Positive alginate biosynthesis regulatory protein OS=Pseudomonas aeruginosa (strain ATCC 15692 / DSM 22644 / CIP 104116 / JCM 14847 / LMG 12228 / 1C / PRS 101 / PAO1) GN=algR PE=3 SV=1	27.608	0.93683	1742500	0	0	0	1	11.7	633260	0	0	0	1	11.7	949560
P26480	sp|P26480|RPOD_PSEAE RNA polymerase sigma factor RpoD OS=Pseudomonas aeruginosa (strain ATCC 15692 / DSM 22644 / CIP 104116 / JCM 14847 / LMG 12228 / 1C / PRS 101 / PAO1) GN=rpoD PE=3 SV=1	69.643	17.324	1050000	1	2.6	22874	2	5.3	445030	0	0	0	2	5.3	480210
P29364	sp|P29364|KHSE_PSEAE Homoserine kinase OS=Pseudomonas aeruginosa (strain ATCC 15692 / DSM 22644 / CIP 104116 / JCM 14847 / LMG 12228 / 1C / PRS 101 / PAO1) GN=thrB PE=3 SV=2	35.374	0.92092	225980	0	0	0	1	8.9	225980	0	0	0	0	0	0
P30718	sp|P30718|CH60_PSEAE 60 kDa chaperonin OS=Pseudomonas aeruginosa (strain ATCC 15692 / DSM 22644 / CIP 104116 / JCM 14847 / LMG 12228 / 1C / PRS 101 / PAO1) GN=groL PE=1 SV=3	57.085	221.69	118020000	13	46.1	521690	25	66	45963000	22	64.9	9902900	25	66	40692000
P31961	sp|P31961|EDD_PSEAE Phosphogluconate dehydratase OS=Pseudomonas aeruginosa (strain ATCC 15692 / DSM 22644 / CIP 104116 / JCM 14847 / LMG 12228 / 1C / PRS 101 / PAO1) GN=edd PE=3 SV=3	65.182	5.9872	559500	0	0	0	0	0	0	0	0	0	2	5.1	377540
P32722	sp|P32722|PORD_PSEAE Porin D OS=Pseudomonas aeruginosa (strain ATCC 15692 / DSM 22644 / CIP 104116 / JCM 14847 / LMG 12228 / 1C / PRS 101 / PAO1) GN=oprD PE=1 SV=1	48.36	52.121	19899000	3	14	137600	7	23.9	5570100	6	23.3	1029000	9	28.9	9195100
P37798	sp|P37798|ACCC_PSEAE Biotin carboxylase OS=Pseudomonas aeruginosa (strain ATCC 15692 / DSM 22644 / CIP 104116 / JCM 14847 / LMG 12228 / 1C / PRS 101 / PAO1) GN=accC PE=1 SV=1	48.887	26.904	10659000	0	0	0	5	17.8	2250300	4	15.1	617760	7	23.2	5117200
P37799	sp|P37799|BCCP_PSEAE Biotin carboxyl carrier protein of acetyl-CoA carboxylase OS=Pseudomonas aeruginosa (strain ATCC 15692 / DSM 22644 / CIP 104116 / JCM 14847 / LMG 12228 / 1C / PRS 101 / PAO1) GN=accB PE=3 SV=1	16.455	188.95	4021600000	7	57.7	20905000	7	57.7	787300000	7	57.7	263100000	8	58.3	1114300000
P38100	sp|P38100|CARB_PSEAE Carbamoyl-phosphate synthase large chain OS=Pseudomonas aeruginosa (strain ATCC 15692 / DSM 22644 / CIP 104116 / JCM 14847 / LMG 12228 / 1C / PRS 101 / PAO1) GN=carB PE=3 SV=3	117.33	85.595	6629700	0	0	0	13	21	2274700	9	15	302030	13	21	3013600
P40947	sp|P40947|SSB_PSEAE Single-stranded DNA-binding protein OS=Pseudomonas aeruginosa (strain ATCC 15692 / DSM 22644 / CIP 104116 / JCM 14847 / LMG 12228 / 1C / PRS 101 / PAO1) GN=ssb PE=1 SV=3	18.557	5.8267	1973900	0	0	0	1	8.5	218130	3	29.1	1435700	1	8.5	320040
P43334	sp|P43334|PH4H_PSEAE Phenylalanine-4-hydroxylase OS=Pseudomonas aeruginosa (strain ATCC 15692 / DSM 22644 / CIP 104116 / JCM 14847 / LMG 12228 / 1C / PRS 101 / PAO1) GN=phhA PE=3 SV=2	30.321	6.0936	2796600	0	0	0	3	25.2	1513000	1	9.9	56006	3	25.2	1227500
P43335	sp|P43335|PHS_PSEAE Pterin-4-alpha-carbinolamine dehydratase OS=Pseudomonas aeruginosa (strain ATCC 15692 / DSM 22644 / CIP 104116 / JCM 14847 / LMG 12228 / 1C / PRS 101 / PAO1) GN=phhB PE=3 SV=1	13.333	2.1918	2741600	0	0	0	0	0	0	1	8.5	150360	2	15.3	2013500
P43336	sp|P43336|PHHC_PSEAE Aromatic-amino-acid aminotransferase OS=Pseudomonas aeruginosa (strain ATCC 15692 / DSM 22644 / CIP 104116 / JCM 14847 / LMG 12228 / 1C / PRS 101 / PAO1) GN=phhC PE=3 SV=2	43.273	40.573	6913800	0	0	0	4	17.8	1599900	2	7.3	170050	6	23.3	3108200
P47203	sp|P47203|FTSA_PSEAE Cell division protein FtsA OS=Pseudomonas aeruginosa (strain ATCC 15692 / DSM 22644 / CIP 104116 / JCM 14847 / LMG 12228 / 1C / PRS 101 / PAO1) GN=ftsA PE=3 SV=2	44.646	15.688	2311100	0	0	0	6	19.9	1100600	0	0	0	5	15.8	1056100
P47204	sp|P47204|FTSZ_PSEAE Cell division protein FtsZ OS=Pseudomonas aeruginosa (strain ATCC 15692 / DSM 22644 / CIP 104116 / JCM 14847 / LMG 12228 / 1C / PRS 101 / PAO1) GN=ftsZ PE=1 SV=2	41.218	2.6841	228300	0	0	0	1	4.8	53307	0	0	0	1	4.8	152670
P47205	sp|P47205|LPXC_PSEAE UDP-3-O-acyl-N-acetylglucosamine deacetylase OS=Pseudomonas aeruginosa (strain ATCC 15692 / DSM 22644 / CIP 104116 / JCM 14847 / LMG 12228 / 1C / PRS 101 / PAO1) GN=lpxC PE=1 SV=2	33.435	10.979	1836400	1	5	7661.4	2	10.6	738320	1	6.6	97613	2	10.6	992820
P48247	sp|P48247|GSA_PSEAE Glutamate-1-semialdehyde 2,1-aminomutase OS=Pseudomonas aeruginosa (strain ATCC 15692 / DSM 22644 / CIP 104116 / JCM 14847 / LMG 12228 / 1C / PRS 101 / PAO1) GN=hemL PE=1 SV=2	45.397	9.6593	1919000	0	0	0	2	8.2	297970	0	0	0	2	8.2	1290200
P48372	sp|P48372|GYRA_PSEAE DNA gyrase subunit A OS=Pseudomonas aeruginosa (strain ATCC 15692 / DSM 22644 / CIP 104116 / JCM 14847 / LMG 12228 / 1C / PRS 101 / PAO1) GN=gyrA PE=3 SV=1	101.13	2.9944	6611.4	1	1.8	6611.4	0	0	0	0	0	0	0	0	0
P50987	sp|P50987|ARLY_PSEAE Argininosuccinate lyase OS=Pseudomonas aeruginosa (strain ATCC 15692 / DSM 22644 / CIP 104116 / JCM 14847 / LMG 12228 / 1C / PRS 101 / PAO1) GN=argH PE=3 SV=2	51.64	11.024	326630	0	0	0	1	2.8	100630	0	0	0	1	2.8	226000
P52002	sp|P52002|MEXB_PSEAE Multidrug resistance protein MexB OS=Pseudomonas aeruginosa (strain ATCC 15692 / DSM 22644 / CIP 104116 / JCM 14847 / LMG 12228 / 1C / PRS 101 / PAO1) GN=mexB PE=1 SV=2	112.79	3.2451	561750	0	0	0	2	2.6	346790	0	0	0	1	1.3	209970
P53593	sp|P53593|SUCC_PSEAE Succinate--CoA ligase [ADP-forming] subunit beta OS=Pseudomonas aeruginosa (strain ATCC 15692 / DSM 22644 / CIP 104116 / JCM 14847 / LMG 12228 / 1C / PRS 101 / PAO1) GN=sucC PE=3 SV=2	41.542	205.94	66422000	5	20.9	187930	16	53.9	18847000	11	39.9	2578600	15	51.5	31508000
P53641	sp|P53641|SODF_PSEAE Superoxide dismutase [Fe] OS=Pseudomonas aeruginosa (strain ATCC 15692 / DSM 22644 / CIP 104116 / JCM 14847 / LMG 12228 / 1C / PRS 101 / PAO1) GN=sodB PE=3 SV=3	21.351	16.361	35285000	1	8.3	107310	3	21.8	11140000	3	21.8	1857200	3	21.8	11848000
P55218	sp|P55218|METZ_PSEAE O-succinylhomoserine sulfhydrylase OS=Pseudomonas aeruginosa (strain ATCC 15692 / DSM 22644 / CIP 104116 / JCM 14847 / LMG 12228 / 1C / PRS 101 / PAO1) GN=metZ PE=1 SV=1	43.184	2.5917	955540	0	0	0	2	10.7	452300	1	6.7	87774	2	10.7	415470
P57112	sp|P57112|STHA_PSEAE Soluble pyridine nucleotide transhydrogenase OS=Pseudomonas aeruginosa (strain ATCC 15692 / DSM 22644 / CIP 104116 / JCM 14847 / LMG 12228 / 1C / PRS 101 / PAO1) GN=sthA PE=1 SV=2	51.16	3.0319	928240	0	0	0	3	8.2	231360	0	0	0	3	7.5	515890
P57668	sp|P57668|TPX_PSEAE Probable thiol peroxidase OS=Pseudomonas aeruginosa (strain ATCC 15692 / DSM 22644 / CIP 104116 / JCM 14847 / LMG 12228 / 1C / PRS 101 / PAO1) GN=tpx PE=3 SV=1	17.234	6.11	1668100	0	0	0	1	6.1	202380	1	6.1	87992	1	7.9	224240
P72170	sp|P72170|PYRC_PSEAE Dihydroorotase OS=Pseudomonas aeruginosa (strain ATCC 15692 / DSM 22644 / CIP 104116 / JCM 14847 / LMG 12228 / 1C / PRS 101 / PAO1) GN=pyrC PE=3 SV=2	38.406	2.4624	42096	0	0	0	1	4.6	10267	0	0	0	1	4.6	31829
P72173	sp|P72173|AAT_PSEAE Aspartate aminotransferase OS=Pseudomonas aeruginosa (strain ATCC 15692 / DSM 22644 / CIP 104116 / JCM 14847 / LMG 12228 / 1C / PRS 101 / PAO1) GN=aspC PE=3 SV=2	43.319	36.426	8342400	1	3.5	4772.9	7	25.9	1309700	3	12.8	257030	8	27.9	4504100
P77915	sp|P77915|HEMN_PSEAE Oxygen-independent coproporphyrinogen III oxidase OS=Pseudomonas aeruginosa (strain ATCC 15692 / DSM 22644 / CIP 104116 / JCM 14847 / LMG 12228 / 1C / PRS 101 / PAO1) GN=hemN PE=2 SV=2	52.488	23.552	6836100	0	0	0	7	23.5	1612200	1	5	82457	8	28.9	4511900
Q51342	sp|Q51342|PUR1_PSEAE Amidophosphoribosyltransferase OS=Pseudomonas aeruginosa (strain ATCC 15692 / DSM 22644 / CIP 104116 / JCM 14847 / LMG 12228 / 1C / PRS 101 / PAO1) GN=purF PE=3 SV=3	55.369	17.414	1530700	0	0	0	2	8	534140	1	4.6	45105	2	8	841660
Q51422	sp|Q51422|SYDND_PSEAE Aspartate--tRNA(Asp/Asn) ligase OS=Pseudomonas aeruginosa (strain ATCC 15692 / DSM 22644 / CIP 104116 / JCM 14847 / LMG 12228 / 1C / PRS 101 / PAO1) GN=aspS PE=1 SV=2	66.207	25.337	4594700	1	2	0	6	15.9	1539900	2	4.7	78082	6	15.9	2419000
Q51561	sp|Q51561|RPOB_PSEAE DNA-directed RNA polymerase subunit beta OS=Pseudomonas aeruginosa (strain ATCC 15692 / DSM 22644 / CIP 104116 / JCM 14847 / LMG 12228 / 1C / PRS 101 / PAO1) GN=rpoB PE=3 SV=2	150.84	282.36	14875000	6	9.9	35903	34	44.4	5232800	17	22.4	490620	32	40.7	6061700
Q51567	sp|Q51567|SUCD_PSEAE Succinate--CoA ligase [ADP-forming] subunit alpha OS=Pseudomonas aeruginosa (strain ATCC 15692 / DSM 22644 / CIP 104116 / JCM 14847 / LMG 12228 / 1C / PRS 101 / PAO1) GN=sucD PE=3 SV=2	30.266	33.255	24683000	3	25.4	99433	10	57.6	7523600	8	42.4	1657900	10	57.6	10363000
Q59636	sp|Q59636|NDK_PSEAE Nucleoside diphosphate kinase OS=Pseudomonas aeruginosa (strain ATCC 15692 / DSM 22644 / CIP 104116 / JCM 14847 / LMG 12228 / 1C / PRS 101 / PAO1) GN=ndk PE=3 SV=2	15.592	18.47	6605400	0	0	0	2	23.1	2289300	2	23.1	1037900	2	23.1	1666400
Q59637	sp|Q59637|ODP1_PSEAE Pyruvate dehydrogenase E1 component OS=Pseudomonas aeruginosa (strain ATCC 15692 / DSM 22644 / CIP 104116 / JCM 14847 / LMG 12228 / 1C / PRS 101 / PAO1) GN=aceE PE=3 SV=2	99.563	110.14	15716000	4	5.4	30438	27	40.7	5325800	10	12.8	351660	27	41.8	8253700
Q59638	sp|Q59638|ODP2_PSEAE Dihydrolipoyllysine-residue acetyltransferase component of pyruvate dehydrogenase complex OS=Pseudomonas aeruginosa (strain ATCC 15692 / DSM 22644 / CIP 104116 / JCM 14847 / LMG 12228 / 1C / PRS 101 / PAO1) GN=aceF PE=2 SV=2	56.708	43.777	11127000	2	3.7	8103.9	14	38.8	2790900	9	28.2	418400	14	38.8	5567100
Q59643	sp|Q59643|HEM2_PSEAE Delta-aminolevulinic acid dehydratase OS=Pseudomonas aeruginosa (strain ATCC 15692 / DSM 22644 / CIP 104116 / JCM 14847 / LMG 12228 / 1C / PRS 101 / PAO1) GN=hemB PE=1 SV=1	37.037	27.313	8916200	0	0	0	4	17.8	2966600	2	11.3	859360	4	17.8	3464900
Q59650	sp|Q59650|MURE_PSEAE UDP-N-acetylmuramoyl-L-alanyl-D-glutamate--2,6-diaminopimelate ligase OS=Pseudomonas aeruginosa (strain ATCC 15692 / DSM 22644 / CIP 104116 / JCM 14847 / LMG 12228 / 1C / PRS 101 / PAO1) GN=murE PE=3 SV=2	51.263	1.3827	45730000	0	0	0	2	7.6	15644000	1	4.1	9542300	0	0	0
Q59653	sp|Q59653|PYRB_PSEAE Aspartate carbamoyltransferase OS=Pseudomonas aeruginosa (strain ATCC 15692 / DSM 22644 / CIP 104116 / JCM 14847 / LMG 12228 / 1C / PRS 101 / PAO1) GN=pyrB PE=3 SV=2	36.629	37.606	366070	0	0	0	1	5.7	150940	1	5.7	11669	1	5.7	164380
Q9HT14	sp|Q9HT14|ATP6_PSEAE ATP synthase subunit a OS=Pseudomonas aeruginosa (strain ATCC 15692 / DSM 22644 / CIP 104116 / JCM 14847 / LMG 12228 / 1C / PRS 101 / PAO1) GN=atpB PE=3 SV=1	31.92	21.843	27956000	0	0	0	6	30.8	13615000	2	14.2	314910	6	30.8	11283000
Q9HT16	sp|Q9HT16|ATPF_PSEAE ATP synthase subunit b OS=Pseudomonas aeruginosa (strain ATCC 15692 / DSM 22644 / CIP 104116 / JCM 14847 / LMG 12228 / 1C / PRS 101 / PAO1) GN=atpF PE=3 SV=1	16.956	10.298	3885200	1	10.9	70812	2	15.4	654600	1	7.1	57774	2	15.4	1515900
Q9HT17	sp|Q9HT17|ATPD_PSEAE ATP synthase subunit delta OS=Pseudomonas aeruginosa (strain ATCC 15692 / DSM 22644 / CIP 104116 / JCM 14847 / LMG 12228 / 1C / PRS 101 / PAO1) GN=atpH PE=3 SV=1	19.26	1.7569	2249100	0	0	0	1	18	763080	1	6.2	83783	2	24.2	1402300
Q9HT18	sp|Q9HT18|ATPA_PSEAE ATP synthase subunit alpha OS=Pseudomonas aeruginosa (strain ATCC 15692 / DSM 22644 / CIP 104116 / JCM 14847 / LMG 12228 / 1C / PRS 101 / PAO1) GN=atpA PE=3 SV=1	55.393	94.938	45251000	5	15.2	52027	18	47.7	12121000	17	43.2	2548900	18	45.7	17914000
Q9HT19	sp|Q9HT19|ATPG_PSEAE ATP synthase gamma chain OS=Pseudomonas aeruginosa (strain ATCC 15692 / DSM 22644 / CIP 104116 / JCM 14847 / LMG 12228 / 1C / PRS 101 / PAO1) GN=atpG PE=3 SV=1	31.553	23.189	13947000	0	0	0	7	38.5	4320700	4	26.9	780890	7	38.5	5236400
Q9HT20	sp|Q9HT20|ATPB_PSEAE ATP synthase subunit beta OS=Pseudomonas aeruginosa (strain ATCC 15692 / DSM 22644 / CIP 104116 / JCM 14847 / LMG 12228 / 1C / PRS 101 / PAO1) GN=atpD PE=3 SV=1	49.499	290.07	87521000	7	30.1	191610	23	81.2	40636000	18	59.8	3525100	22	77.5	33115000
Q9HT21	sp|Q9HT21|ATPE_PSEAE ATP synthase epsilon chain OS=Pseudomonas aeruginosa (strain ATCC 15692 / DSM 22644 / CIP 104116 / JCM 14847 / LMG 12228 / 1C / PRS 101 / PAO1) GN=atpC PE=3 SV=1	14.726	3.628	4424100	0	0	0	1	9.9	566160	1	9.9	119880	1	9.9	2011000
Q9HT25	sp|Q9HT25|GLMS_PSEAE Glutamine--fructose-6-phosphate aminotransferase [isomerizing] OS=Pseudomonas aeruginosa (strain ATCC 15692 / DSM 22644 / CIP 104116 / JCM 14847 / LMG 12228 / 1C / PRS 101 / PAO1) GN=glmS PE=3 SV=3	66.294	2.5041	16647	1	3.9	16647	0	0	0	0	0	0	0	0	0
Q9HT45	tr|Q9HT45|Q9HT45_PSEAE Uncharacterized protein OS=Pseudomonas aeruginosa (strain ATCC 15692 / DSM 22644 / CIP 104116 / JCM 14847 / LMG 12228 / 1C / PRS 101 / PAO1) GN=PA5528 PE=4 SV=1	30.414	34.391	25754000	1	14.1	30611	8	50	14715000	7	45.8	3688800	6	35.9	4334700
Q9HT79	tr|Q9HT79|Q9HT79_PSEAE Uncharacterized protein OS=Pseudomonas aeruginosa (strain ATCC 15692 / DSM 22644 / CIP 104116 / JCM 14847 / LMG 12228 / 1C / PRS 101 / PAO1) GN=PA5494 PE=1 SV=1	10.794	1.0005	495560	0	0	0	0	0	0	1	9.4	495560	0	0	0
Q9HT95	sp|Q9HT95|ATSE4_PSEAE Acetyltransferase PA5475 OS=Pseudomonas aeruginosa (strain ATCC 15692 / DSM 22644 / CIP 104116 / JCM 14847 / LMG 12228 / 1C / PRS 101 / PAO1) GN=PA5475 PE=3 SV=1	21	7.9212	5933100	1	17.2	57032	3	33.9	2259500	1	10.8	329060	3	33.9	2978100
Q9HTD1	tr|Q9HTD1|Q9HTD1_PSEAE Probable transcarboxylase subunit OS=Pseudomonas aeruginosa (strain ATCC 15692 / DSM 22644 / CIP 104116 / JCM 14847 / LMG 12228 / 1C / PRS 101 / PAO1) GN=PA5435 PE=4 SV=1	66.095	323.31	869000000	25	61	1368300	41	75.3	161310000	35	72.7	43528000	43	75.3	294530000
Q9HTD7	sp|Q9HTD7|ASPA_PSEAE Aspartate ammonia-lyase OS=Pseudomonas aeruginosa (strain ATCC 15692 / DSM 22644 / CIP 104116 / JCM 14847 / LMG 12228 / 1C / PRS 101 / PAO1) GN=aspA PE=3 SV=1	51.069	20.227	12326000	0	0	0	9	42.2	4464400	5	27	438730	9	42.2	5929200
Q9HTD9	tr|Q9HTD9|Q9HTD9_PSEAE Alcohol dehydrogenase OS=Pseudomonas aeruginosa (strain ATCC 15692 / DSM 22644 / CIP 104116 / JCM 14847 / LMG 12228 / 1C / PRS 101 / PAO1) GN=adhA PE=1 SV=1	35.911	23.56	20947000	2	10.5	23140	6	26.6	8179200	3	19.3	468410	5	23.1	8289500
Q9HTF1	sp|Q9HTF1|LTAE_PSEAE Low specificity L-threonine aldolase OS=Pseudomonas aeruginosa (strain ATCC 15692 / DSM 22644 / CIP 104116 / JCM 14847 / LMG 12228 / 1C / PRS 101 / PAO1) GN=ltaE PE=3 SV=1	38.213	8.5582	2145200	0	0	0	2	7.8	564460	1	4.9	52785	2	7.8	1161800
Q9HTL9	tr|Q9HTL9|Q9HTL9_PSEAE Uncharacterized protein OS=Pseudomonas aeruginosa (strain ATCC 15692 / DSM 22644 / CIP 104116 / JCM 14847 / LMG 12228 / 1C / PRS 101 / PAO1) GN=PA5339 PE=4 SV=1	13.609	1.0961	129230	0	0	0	0	0	0	1	12.7	129230	0	0	0
Q9HTM4	tr|Q9HTM4|Q9HTM4_PSEAE Uncharacterized protein OS=Pseudomonas aeruginosa (strain ATCC 15692 / DSM 22644 / CIP 104116 / JCM 14847 / LMG 12228 / 1C / PRS 101 / PAO1) GN=PA5333 PE=4 SV=1	13.572	11.903	1392400	0	0	0	1	13	221470	0	0	0	1	13	1171000
Q9HTN8	sp|Q9HTN8|RL28_PSEAE 50S ribosomal protein L28 OS=Pseudomonas aeruginosa (strain ATCC 15692 / DSM 22644 / CIP 104116 / JCM 14847 / LMG 12228 / 1C / PRS 101 / PAO1) GN=rpmB PE=3 SV=1	9.0655	2.7439	6360900	0	0	0	1	12.8	1971600	1	12.8	0	1	12.8	2775800
Q9HTP2	tr|Q9HTP2|Q9HTP2_PSEAE Probable aldehyde dehydrogenase OS=Pseudomonas aeruginosa (strain ATCC 15692 / DSM 22644 / CIP 104116 / JCM 14847 / LMG 12228 / 1C / PRS 101 / PAO1) GN=PA5312 PE=3 SV=1	53.143	22.044	8280800	0	0	0	8	30.2	2027600	6	22.9	752040	8	30.2	3740800
Q9HTQ0	sp|Q9HTQ0|DADA1_PSEAE D-amino acid dehydrogenase 1 OS=Pseudomonas aeruginosa (strain ATCC 15692 / DSM 22644 / CIP 104116 / JCM 14847 / LMG 12228 / 1C / PRS 101 / PAO1) GN=dadA1 PE=1 SV=1	47.139	28.425	3915500	2	8.3	54083	6	20.8	1279700	1	2.1	30017	7	22.7	2218100
Q9HTQ4	tr|Q9HTQ4|Q9HTQ4_PSEAE Cytochrome c5 OS=Pseudomonas aeruginosa (strain ATCC 15692 / DSM 22644 / CIP 104116 / JCM 14847 / LMG 12228 / 1C / PRS 101 / PAO1) GN=cycB PE=4 SV=1	13.458	19.758	413290	0	0	0	0	0	0	0	0	0	1	13.2	413290
Q9HTR6	tr|Q9HTR6|Q9HTR6_PSEAE Nitrogen regulatory protein P-II 2 OS=Pseudomonas aeruginosa (strain ATCC 15692 / DSM 22644 / CIP 104116 / JCM 14847 / LMG 12228 / 1C / PRS 101 / PAO1) GN=glnK PE=3 SV=1	12.286	9.4709	1967200	0	0	0	0	0	0	3	30.4	1967200	0	0	0
Q9HTR9	tr|Q9HTR9|Q9HTR9_PSEAE Uncharacterized protein OS=Pseudomonas aeruginosa (strain ATCC 15692 / DSM 22644 / CIP 104116 / JCM 14847 / LMG 12228 / 1C / PRS 101 / PAO1) GN=PA5285 PE=4 SV=1	11.168	4.2526	2253100	0	0	0	0	0	0	2	21	2253100	0	0	0
Q9HTT8	tr|Q9HTT8|Q9HTT8_PSEAE Uncharacterized protein OS=Pseudomonas aeruginosa (strain ATCC 15692 / DSM 22644 / CIP 104116 / JCM 14847 / LMG 12228 / 1C / PRS 101 / PAO1) GN=PA5257 PE=4 SV=1	46.643	1.4892	242870	0	0	0	1	3.6	58272	0	0	0	1	3.6	184600
Q9HTV1	sp|Q9HTV1|RHO_PSEAE Transcription termination factor Rho OS=Pseudomonas aeruginosa (strain ATCC 15692 / DSM 22644 / CIP 104116 / JCM 14847 / LMG 12228 / 1C / PRS 101 / PAO1) GN=rho PE=3 SV=1	47.069	14.269	279900	0	0	0	1	5.3	126640	0	0	0	1	5.3	153250
Q9HTW6	tr|Q9HTW6|Q9HTW6_PSEAE Aminopeptidase P OS=Pseudomonas aeruginosa (strain ATCC 15692 / DSM 22644 / CIP 104116 / JCM 14847 / LMG 12228 / 1C / PRS 101 / PAO1) GN=pepP PE=4 SV=1	49.71	1.4225	950170	0	0	0	2	6.1	165070	1	4.1	88347	1	2	124020
Q9HTZ7	sp|Q9HTZ7|PCKA_PSEAE Phosphoenolpyruvate carboxykinase [ATP] OS=Pseudomonas aeruginosa (strain ATCC 15692 / DSM 22644 / CIP 104116 / JCM 14847 / LMG 12228 / 1C / PRS 101 / PAO1) GN=pckA PE=3 SV=1	55.731	5.1644	1740900	2	8.2	18186	3	12.7	891240	0	0	0	3	12.7	831510
Q9HU11	tr|Q9HU11|Q9HU11_PSEAE Uncharacterized protein OS=Pseudomonas aeruginosa (strain ATCC 15692 / DSM 22644 / CIP 104116 / JCM 14847 / LMG 12228 / 1C / PRS 101 / PAO1) GN=PA5178 PE=4 SV=1	15.46	2.5808	2093000	0	0	0	3	26.9	508590	1	7.6	20407	3	26.9	1269300
Q9HU38	tr|Q9HU38|Q9HU38_PSEAE Uncharacterized protein OS=Pseudomonas aeruginosa (strain ATCC 15692 / DSM 22644 / CIP 104116 / JCM 14847 / LMG 12228 / 1C / PRS 101 / PAO1) GN=PA5146 PE=4 SV=1	80.849	0.96209	0	0	0	0	0	0	0	0	0	0	1	1.3	0
Q9HU50	tr|Q9HU50|Q9HU50_PSEAE Probable carboxyl-terminal protease OS=Pseudomonas aeruginosa (strain ATCC 15692 / DSM 22644 / CIP 104116 / JCM 14847 / LMG 12228 / 1C / PRS 101 / PAO1) GN=PA5134 PE=3 SV=1	46.018	1.4908	199940	0	0	0	0	0	0	2	11.9	199940	0	0	0
Q9HU65	sp|Q9HU65|GLNA_PSEAE Glutamine synthetase OS=Pseudomonas aeruginosa (strain ATCC 15692 / DSM 22644 / CIP 104116 / JCM 14847 / LMG 12228 / 1C / PRS 101 / PAO1) GN=glnA PE=1 SV=1	51.944	111.02	16094000	2	8.5	89614	9	29.6	5575200	6	23.9	900220	9	29.6	7167800
Q9HU83	sp|Q9HU83|HUTU_PSEAE Urocanate hydratase OS=Pseudomonas aeruginosa (strain ATCC 15692 / DSM 22644 / CIP 104116 / JCM 14847 / LMG 12228 / 1C / PRS 101 / PAO1) GN=hutU PE=1 SV=1	61.193	1.4293	111580	0	0	0	0	0	0	0	0	0	0	0	0
Q9HUA6	sp|Q9HUA6|OPGH_PSEAE Glucans biosynthesis glucosyltransferase H OS=Pseudomonas aeruginosa (strain ATCC 15692 / DSM 22644 / CIP 104116 / JCM 14847 / LMG 12228 / 1C / PRS 101 / PAO1) GN=opgH PE=3 SV=1	96.994	2.2356	36151	0	0	0	1	1.9	4386.1	0	0	0	1	1.9	8638.8
Q9HUC3	tr|Q9HUC3|Q9HUC3_PSEAE Polyhydroxyalkanoate synthesis protein PhaF OS=Pseudomonas aeruginosa (strain ATCC 15692 / DSM 22644 / CIP 104116 / JCM 14847 / LMG 12228 / 1C / PRS 101 / PAO1) GN=phaF PE=4 SV=1	30.577	2.0117	4400300	0	0	0	3	20.4	1311100	2	5.8	320070	3	20.4	1419000
Q9HUC8	sp|Q9HUC8|SYR_PSEAE Arginine--tRNA ligase OS=Pseudomonas aeruginosa (strain ATCC 15692 / DSM 22644 / CIP 104116 / JCM 14847 / LMG 12228 / 1C / PRS 101 / PAO1) GN=argS PE=3 SV=1	65.199	60.116	4050100	1	4.1	13280	6	12.3	776930	0	0	0	7	16.4	2846300
Q9HUD3	tr|Q9HUD3|Q9HUD3_PSEAE Malic enzyme OS=Pseudomonas aeruginosa (strain ATCC 15692 / DSM 22644 / CIP 104116 / JCM 14847 / LMG 12228 / 1C / PRS 101 / PAO1) GN=PA5046 PE=4 SV=1	45.428	10.508	2203100	0	0	0	1	6.6	674920	0	0	0	2	10.9	1200900
Q9HUE1	tr|Q9HUE1|Q9HUE1_PSEAE Uncharacterized protein OS=Pseudomonas aeruginosa (strain ATCC 15692 / DSM 22644 / CIP 104116 / JCM 14847 / LMG 12228 / 1C / PRS 101 / PAO1) GN=PA5028 PE=4 SV=1	28.643	4.7583	2813100	0	0	0	2	23.9	1493400	0	0	0	2	23.9	1319700
Q9HUE4	tr|Q9HUE4|Q9HUE4_PSEAE Homocysteine synthase OS=Pseudomonas aeruginosa (strain ATCC 15692 / DSM 22644 / CIP 104116 / JCM 14847 / LMG 12228 / 1C / PRS 101 / PAO1) GN=metY PE=3 SV=1	45.177	7.6457	429970	0	0	0	2	14.8	259340	0	0	0	1	9.2	170640
Q9HUG0	tr|Q9HUG0|Q9HUG0_PSEAE Probable carbamoyl transferase OS=Pseudomonas aeruginosa (strain ATCC 15692 / DSM 22644 / CIP 104116 / JCM 14847 / LMG 12228 / 1C / PRS 101 / PAO1) GN=PA5005 PE=4 SV=1	66.079	5.0204	1090300	1	3.2	7553	2	6.7	357820	0	0	0	2	6.7	724890
Q9HUJ1	tr|Q9HUJ1|Q9HUJ1_PSEAE Probable outer membrane protein OS=Pseudomonas aeruginosa (strain ATCC 15692 / DSM 22644 / CIP 104116 / JCM 14847 / LMG 12228 / 1C / PRS 101 / PAO1) GN=PA4974 PE=4 SV=1	53.405	0.97215	71914	0	0	0	1	2.5	50879	1	2.5	21035	0	0	0
Q9HUM2	tr|Q9HUM2|Q9HUM2_PSEAE Protease subunit HflK OS=Pseudomonas aeruginosa (strain ATCC 15692 / DSM 22644 / CIP 104116 / JCM 14847 / LMG 12228 / 1C / PRS 101 / PAO1) GN=hflK PE=4 SV=1	44.044	12.092	161850	0	0	0	1	6.2	19406	1	6.2	4637.6	1	6.2	63886
Q9HUM6	sp|Q9HUM6|PURA_PSEAE Adenylosuccinate synthetase OS=Pseudomonas aeruginosa (strain ATCC 15692 / DSM 22644 / CIP 104116 / JCM 14847 / LMG 12228 / 1C / PRS 101 / PAO1) GN=purA PE=3 SV=1	46.814	23.914	7846800	0	0	0	5	20.9	2525000	1	3.3	172090	6	23.3	4098300
Q9HUM9	sp|Q9HUM9|RS6_PSEAE 30S ribosomal protein S6 OS=Pseudomonas aeruginosa (strain ATCC 15692 / DSM 22644 / CIP 104116 / JCM 14847 / LMG 12228 / 1C / PRS 101 / PAO1) GN=rpsF PE=3 SV=1	16.164	2.6407	4160100	0	0	0	1	7.2	683780	1	7.2	229400	1	7.2	1792300
Q9HUN0	sp|Q9HUN0|RS18_PSEAE 30S ribosomal protein S18 OS=Pseudomonas aeruginosa (strain ATCC 15692 / DSM 22644 / CIP 104116 / JCM 14847 / LMG 12228 / 1C / PRS 101 / PAO1) GN=rpsR PE=3 SV=1	8.8732	1.1127	5878000	0	0	0	1	17.1	1236900	0	0	0	1	17.1	4118800
Q9HUN2	sp|Q9HUN2|RL9_PSEAE 50S ribosomal protein L9 OS=Pseudomonas aeruginosa (strain ATCC 15692 / DSM 22644 / CIP 104116 / JCM 14847 / LMG 12228 / 1C / PRS 101 / PAO1) GN=rplI PE=3 SV=1	15.532	7.4108	682530	1	10.1	7935	1	10.1	177380	1	10.1	124570	1	10.1	372650
Q9HUQ1	tr|Q9HUQ1|Q9HUQ1_PSEAE Branched chain amino acid ABC transporter membrane protein OS=Pseudomonas aeruginosa (strain ATCC 15692 / DSM 22644 / CIP 104116 / JCM 14847 / LMG 12228 / 1C / PRS 101 / PAO1) GN=PA4912 PE=3 SV=1	32.783	-2	0	0	0	0	0	0	0	0	0	0	0	0	0
Q9HUT5	tr|Q9HUT5|Q9HUT5_PSEAE Probable transcriptional regulator OS=Pseudomonas aeruginosa (strain ATCC 15692 / DSM 22644 / CIP 104116 / JCM 14847 / LMG 12228 / 1C / PRS 101 / PAO1) GN=PA4878 PE=4 SV=1	31.168	2.8897	2056300	0	0	0	2	11.9	1274400	0	0	0	2	11.9	781920
Q9HUY5	tr|Q9HUY5|Q9HUY5_PSEAE Mg(2+) transport ATPase, P-type 2 OS=Pseudomonas aeruginosa (strain ATCC 15692 / DSM 22644 / CIP 104116 / JCM 14847 / LMG 12228 / 1C / PRS 101 / PAO1) GN=mgtA PE=4 SV=1	100.05	-2	50897	0	0	0	0	0	0	1	2	50897	0	0	0
Q9HV28	tr|Q9HV28|Q9HV28_PSEAE Uncharacterized protein OS=Pseudomonas aeruginosa (strain ATCC 15692 / DSM 22644 / CIP 104116 / JCM 14847 / LMG 12228 / 1C / PRS 101 / PAO1) GN=PA4780 PE=4 SV=1	33.142	-2	1078600	0	0	0	1	4	402340	0	0	0	1	4	676260
Q9HV43	sp|Q9HV43|DNAK_PSEAE Chaperone protein DnaK OS=Pseudomonas aeruginosa (strain ATCC 15692 / DSM 22644 / CIP 104116 / JCM 14847 / LMG 12228 / 1C / PRS 101 / PAO1) GN=dnaK PE=3 SV=1	68.402	58.576	11723000	1	3.6	5541.9	13	33.6	3017300	11	28.6	1458900	12	31.6	4851700
Q9HV46	sp|Q9HV46|GREA_PSEAE Transcription elongation factor GreA OS=Pseudomonas aeruginosa (strain ATCC 15692 / DSM 22644 / CIP 104116 / JCM 14847 / LMG 12228 / 1C / PRS 101 / PAO1) GN=greA PE=3 SV=1	17.158	16.72	1424100	0	0	0	1	10.8	240270	3	29.1	1183800	0	0	0
Q9HV48	tr|Q9HV48|Q9HV48_PSEAE ATP-dependent zinc metalloprotease FtsH OS=Pseudomonas aeruginosa (strain ATCC 15692 / DSM 22644 / CIP 104116 / JCM 14847 / LMG 12228 / 1C / PRS 101 / PAO1) GN=ftsH PE=3 SV=1	69.954	0.94316	302940	0	0	0	1	3.6	160680	0	0	0	1	3.6	142260
Q9HV50	sp|Q9HV50|GLMM_PSEAE Phosphoglucosamine mutase OS=Pseudomonas aeruginosa (strain ATCC 15692 / DSM 22644 / CIP 104116 / JCM 14847 / LMG 12228 / 1C / PRS 101 / PAO1) GN=glmM PE=3 SV=1	47.796	15.544	2131900	0	0	0	4	17.3	905390	1	6.3	54547	4	17.3	1172000
Q9HV54	tr|Q9HV54|Q9HV54_PSEAE Transcription termination/antitermination protein NusA OS=Pseudomonas aeruginosa (strain ATCC 15692 / DSM 22644 / CIP 104116 / JCM 14847 / LMG 12228 / 1C / PRS 101 / PAO1) GN=nusA PE=3 SV=1	54.658	52.763	4353000	1	4.3	12373	5	15.8	1967700	3	11.2	231070	5	17	1383700
Q9HV55	sp|Q9HV55|IF2_PSEAE Translation initiation factor IF-2 OS=Pseudomonas aeruginosa (strain ATCC 15692 / DSM 22644 / CIP 104116 / JCM 14847 / LMG 12228 / 1C / PRS 101 / PAO1) GN=infB PE=3 SV=1	90.911	16.615	821120	1	3.6	8852.4	2	4.3	484000	1	2.6	45864	2	4.3	250490
Q9HV59	sp|Q9HV59|PNP_PSEAE Polyribonucleotide nucleotidyltransferase OS=Pseudomonas aeruginosa (strain ATCC 15692 / DSM 22644 / CIP 104116 / JCM 14847 / LMG 12228 / 1C / PRS 101 / PAO1) GN=pnp PE=3 SV=1	75.452	37.398	7970900	2	6.6	21493	11	22.4	3345600	6	12.6	369920	10	20.1	2992300
Q9HV96	tr|Q9HV96|Q9HV96_PSEAE Uncharacterized protein OS=Pseudomonas aeruginosa (strain ATCC 15692 / DSM 22644 / CIP 104116 / JCM 14847 / LMG 12228 / 1C / PRS 101 / PAO1) GN=PA4701 PE=4 SV=1	58.376	3.8647	2311300	0	0	0	4	9.6	733360	1	2.3	7307.2	4	9.6	1226300
Q9HVA0	tr|Q9HVA0|Q9HVA0_PSEAE Acetolactate synthase OS=Pseudomonas aeruginosa (strain ATCC 15692 / DSM 22644 / CIP 104116 / JCM 14847 / LMG 12228 / 1C / PRS 101 / PAO1) GN=ilvI PE=3 SV=1	63.018	9.9012	857970	0	0	0	1	3.7	331590	1	3.7	59949	1	3.7	375420
Q9HVA2	sp|Q9HVA2|ILVC_PSEAE Ketol-acid reductoisomerase (NADP(+)) OS=Pseudomonas aeruginosa (strain ATCC 15692 / DSM 22644 / CIP 104116 / JCM 14847 / LMG 12228 / 1C / PRS 101 / PAO1) GN=ilvC PE=1 SV=1	36.424	25.749	6555400	0	0	0	3	13	1168200	3	13.9	357700	7	32	4034700
Q9HVC4	sp|Q9HVC4|RL25_PSEAE 50S ribosomal protein L25 OS=Pseudomonas aeruginosa (strain ATCC 15692 / DSM 22644 / CIP 104116 / JCM 14847 / LMG 12228 / 1C / PRS 101 / PAO1) GN=rplY PE=3 SV=1	21.962	6.4873	8935500	1	4.9	25278	3	23	1955700	3	23	773900	4	28.9	4498900
Q9HVC5	sp|Q9HVC5|KPRS_PSEAE Ribose-phosphate pyrophosphokinase OS=Pseudomonas aeruginosa (strain ATCC 15692 / DSM 22644 / CIP 104116 / JCM 14847 / LMG 12228 / 1C / PRS 101 / PAO1) GN=prs PE=3 SV=1	34.04	55.432	2560600	0	0	0	3	15.7	773450	1	4.5	75105	3	15.7	1712000
Q9HVD1	sp|Q9HVD1|PAGL_PSEAE Lipid A deacylase PagL OS=Pseudomonas aeruginosa (strain ATCC 15692 / DSM 22644 / CIP 104116 / JCM 14847 / LMG 12228 / 1C / PRS 101 / PAO1) GN=pagL PE=1 SV=1	18.393	20.206	13715000	1	12.1	15045	5	45.1	4413200	5	45.1	1718200	5	45.1	6271700
Q9HVF1	sp|Q9HVF1|MQO2_PSEAE Probable malate:quinone oxidoreductase 2 OS=Pseudomonas aeruginosa (strain ATCC 15692 / DSM 22644 / CIP 104116 / JCM 14847 / LMG 12228 / 1C / PRS 101 / PAO1) GN=mqo2 PE=3 SV=1	55.498	11.237	5882400	0	0	0	4	16.8	1947400	2	7.1	89747	4	16.8	3278100
Q9HVH9	tr|Q9HVH9|Q9HVH9_PSEAE Uncharacterized protein OS=Pseudomonas aeruginosa (strain ATCC 15692 / DSM 22644 / CIP 104116 / JCM 14847 / LMG 12228 / 1C / PRS 101 / PAO1) GN=PA4611 PE=4 SV=1	9.7158	5.349	5710600	0	0	0	1	13.1	65311	2	36.9	5471400	1	13.1	173810
Q9HVI3	tr|Q9HVI3|Q9HVI3_PSEAE Uncharacterized protein OS=Pseudomonas aeruginosa (strain ATCC 15692 / DSM 22644 / CIP 104116 / JCM 14847 / LMG 12228 / 1C / PRS 101 / PAO1) GN=PA4606 PE=4 SV=1	73.467	2.6652	517180	0	0	0	1	2.2	251150	1	2.2	83034	1	2.2	183000
Q9HVI7	sp|Q9HVI7|GLYA3_PSEAE Serine hydroxymethyltransferase 3 OS=Pseudomonas aeruginosa (strain ATCC 15692 / DSM 22644 / CIP 104116 / JCM 14847 / LMG 12228 / 1C / PRS 101 / PAO1) GN=glyA2 PE=3 SV=1	45.157	19.202	3215900	1	5.3	20899	3	12.5	1170900	2	10.3	103130	3	12.5	1920900
Q9HVJ1	tr|Q9HVJ1|Q9HVJ1_PSEAE Probable ATP-binding component of ABC transporter OS=Pseudomonas aeruginosa (strain ATCC 15692 / DSM 22644 / CIP 104116 / JCM 14847 / LMG 12228 / 1C / PRS 101 / PAO1) GN=PA4595 PE=4 SV=1	61.32	86.439	18093000	1	2.5	5688.6	16	38.3	7258300	5	12.6	288060	15	35.7	9647100
Q9HVK8	tr|Q9HVK8|Q9HVK8_PSEAE Probable ATP-dependent protease OS=Pseudomonas aeruginosa (strain ATCC 15692 / DSM 22644 / CIP 104116 / JCM 14847 / LMG 12228 / 1C / PRS 101 / PAO1) GN=PA4576 PE=4 SV=1	90.222	4.4711	318780	0	0	0	1	2.1	49261	0	0	0	2	3.9	269520
Q9HVL5	tr|Q9HVL5|Q9HVL5_PSEAE Octaprenyl-diphosphate synthase OS=Pseudomonas aeruginosa (strain ATCC 15692 / DSM 22644 / CIP 104116 / JCM 14847 / LMG 12228 / 1C / PRS 101 / PAO1) GN=ispB PE=3 SV=1	34.851	5.0851	210070	0	0	0	1	8.4	210070	0	0	0	0	0	0
Q9HVL6	sp|Q9HVL6|RL21_PSEAE 50S ribosomal protein L21 OS=Pseudomonas aeruginosa (strain ATCC 15692 / DSM 22644 / CIP 104116 / JCM 14847 / LMG 12228 / 1C / PRS 101 / PAO1) GN=rplU PE=3 SV=1	11.653	2.7141	5005800	1	12.6	9597.2	1	10.7	594880	1	12.6	209240	1	10.7	1597100
Q9HVM1	sp|Q9HVM1|RS20_PSEAE 30S ribosomal protein S20 OS=Pseudomonas aeruginosa (strain ATCC 15692 / DSM 22644 / CIP 104116 / JCM 14847 / LMG 12228 / 1C / PRS 101 / PAO1) GN=rpsT PE=1 SV=3	9.9175	2.1669	4433800	0	0	0	1	15.4	738270	1	15.4	471700	1	15.4	1738800
Q9HVM4	sp|Q9HVM4|SYI_PSEAE Isoleucine--tRNA ligase OS=Pseudomonas aeruginosa (strain ATCC 15692 / DSM 22644 / CIP 104116 / JCM 14847 / LMG 12228 / 1C / PRS 101 / PAO1) GN=ileS PE=3 SV=1	105.46	27.719	3138600	2	4.8	18375	4	6.7	718760	3	5.2	200550	5	7.7	1568500
Q9HVN5	sp|Q9HVN5|CLPB_PSEAE Chaperone protein ClpB OS=Pseudomonas aeruginosa (strain ATCC 15692 / DSM 22644 / CIP 104116 / JCM 14847 / LMG 12228 / 1C / PRS 101 / PAO1) GN=clpB PE=3 SV=1	95.004	18.844	1309500	1	2.6	3419.1	6	9.3	507630	3	4.6	33815	6	9.3	603440
Q9HVS6	tr|Q9HVS6|Q9HVS6_PSEAE Uncharacterized protein OS=Pseudomonas aeruginosa (strain ATCC 15692 / DSM 22644 / CIP 104116 / JCM 14847 / LMG 12228 / 1C / PRS 101 / PAO1) GN=PA4495 PE=4 SV=1	24.879	14.858	1828700	0	0	0	2	11.9	277500	4	28	1551200	0	0	0
Q9HVS8	tr|Q9HVS8|Q9HVS8_PSEAE RoxR OS=Pseudomonas aeruginosa (strain ATCC 15692 / DSM 22644 / CIP 104116 / JCM 14847 / LMG 12228 / 1C / PRS 101 / PAO1) GN=roxR PE=4 SV=1	20.616	1.4107	270680	0	0	0	1	7.5	16491	0	0	0	1	7.5	100560
Q9HVT7	sp|Q9HVT7|GATB_PSEAE Aspartyl/glutamyl-tRNA(Asn/Gln) amidotransferase subunit B OS=Pseudomonas aeruginosa (strain ATCC 15692 / DSM 22644 / CIP 104116 / JCM 14847 / LMG 12228 / 1C / PRS 101 / PAO1) GN=gatB PE=1 SV=1	53.081	2.6178	455830	0	0	0	1	3.1	163580	0	0	0	1	3.1	292240
Q9HVT8	sp|Q9HVT8|GATA_PSEAE Glutamyl-tRNA(Gln) amidotransferase subunit A OS=Pseudomonas aeruginosa (strain ATCC 15692 / DSM 22644 / CIP 104116 / JCM 14847 / LMG 12228 / 1C / PRS 101 / PAO1) GN=gatA PE=1 SV=1	51.862	3.5136	1060400	0	0	0	1	5	357120	0	0	0	2	8.1	703240
Q9HVU0	tr|Q9HVU0|Q9HVU0_PSEAE Rod shape-determining protein MreB OS=Pseudomonas aeruginosa (strain ATCC 15692 / DSM 22644 / CIP 104116 / JCM 14847 / LMG 12228 / 1C / PRS 101 / PAO1) GN=mreB PE=4 SV=1	36.976	11.9	1877200	0	0	0	3	15.9	827280	1	7.2	33883	3	15.9	1016100
Q9HVU9	tr|Q9HVU9|Q9HVU9_PSEAE PmbA protein OS=Pseudomonas aeruginosa (strain ATCC 15692 / DSM 22644 / CIP 104116 / JCM 14847 / LMG 12228 / 1C / PRS 101 / PAO1) GN=pmbA PE=1 SV=1	47.908	1.2198	87198	0	0	0	1	7.6	62010	0	0	0	1	7.6	25187
Q9HVW7	sp|Q9HVW7|MURA_PSEAE UDP-N-acetylglucosamine 1-carboxyvinyltransferase OS=Pseudomonas aeruginosa (strain ATCC 15692 / DSM 22644 / CIP 104116 / JCM 14847 / LMG 12228 / 1C / PRS 101 / PAO1) GN=murA PE=1 SV=1	44.645	12.481	2239800	2	8.6	14346	4	21.1	1033800	0	0	0	3	17.1	1191600
Q9HVY2	sp|Q9HVY2|RL13_PSEAE 50S ribosomal protein L13 OS=Pseudomonas aeruginosa (strain ATCC 15692 / DSM 22644 / CIP 104116 / JCM 14847 / LMG 12228 / 1C / PRS 101 / PAO1) GN=rplM PE=3 SV=1	16.028	4.4699	4378500	0	0	0	1	9.9	1692700	0	0	0	1	9.9	2685700
Q9HVY3	sp|Q9HVY3|RS9_PSEAE 30S ribosomal protein S9 OS=Pseudomonas aeruginosa (strain ATCC 15692 / DSM 22644 / CIP 104116 / JCM 14847 / LMG 12228 / 1C / PRS 101 / PAO1) GN=rpsI PE=3 SV=1	14.615	2.3212	3944500	0	0	0	1	7.7	664690	1	7.7	665520	0	0	0
Q9HVY4	tr|Q9HVY4|Q9HVY4_PSEAE Ubiquinol-cytochrome c reductase iron-sulfur subunit OS=Pseudomonas aeruginosa (strain ATCC 15692 / DSM 22644 / CIP 104116 / JCM 14847 / LMG 12228 / 1C / PRS 101 / PAO1) GN=PA4431 PE=4 SV=1	20.828	7.1573	952510	1	15.2	144380	1	6.1	81690	1	6.1	63321	1	6.1	165400
Q9HVY5	tr|Q9HVY5|Q9HVY5_PSEAE Cytochrome b OS=Pseudomonas aeruginosa (strain ATCC 15692 / DSM 22644 / CIP 104116 / JCM 14847 / LMG 12228 / 1C / PRS 101 / PAO1) GN=PA4430 PE=3 SV=1	46.072	5.8423	5839900	1	2	0	2	6.7	2261800	0	0	0	2	6.7	3578200
Q9HVY6	tr|Q9HVY6|Q9HVY6_PSEAE Probable cytochrome c1 OS=Pseudomonas aeruginosa (strain ATCC 15692 / DSM 22644 / CIP 104116 / JCM 14847 / LMG 12228 / 1C / PRS 101 / PAO1) GN=PA4429 PE=4 SV=1	28.993	28.853	31352000	0	0	0	6	39.2	11531000	2	11.2	303180	7	43.8	13781000
Q9HVZ9	sp|Q9HVZ9|MURD_PSEAE UDP-N-acetylmuramoylalanine--D-glutamate ligase OS=Pseudomonas aeruginosa (strain ATCC 15692 / DSM 22644 / CIP 104116 / JCM 14847 / LMG 12228 / 1C / PRS 101 / PAO1) GN=murD PE=1 SV=1	48.08	3.6381	37173	0	0	0	1	8	37173	0	0	0	0	0	0
Q9HW04	sp|Q9HW04|ARGJ_PSEAE Arginine biosynthesis bifunctional protein ArgJ OS=Pseudomonas aeruginosa (strain ATCC 15692 / DSM 22644 / CIP 104116 / JCM 14847 / LMG 12228 / 1C / PRS 101 / PAO1) GN=argJ PE=3 SV=1	41.762	1.5422	9883.9	1	4	9883.9	0	0	0	0	0	0	0	0	0
Q9HW11	sp|Q9HW11|Y4395_PSEAE UPF0234 protein PA4395 OS=Pseudomonas aeruginosa (strain ATCC 15692 / DSM 22644 / CIP 104116 / JCM 14847 / LMG 12228 / 1C / PRS 101 / PAO1) GN=PA4395 PE=3 SV=1	18.044	4.2859	711150	0	0	0	2	19.5	118140	2	19.5	225220	2	19.5	140350
Q9HW15	tr|Q9HW15|Q9HW15_PSEAE Probable short-chain dehydrogenase OS=Pseudomonas aeruginosa (strain ATCC 15692 / DSM 22644 / CIP 104116 / JCM 14847 / LMG 12228 / 1C / PRS 101 / PAO1) GN=speA PE=4 SV=1	26.72	1.586	1148800	1	4.8	6622.6	1	3.2	134070	1	3.2	73567	1	3.2	568470
Q9HW32	tr|Q9HW32|Q9HW32_PSEAE Insulin-cleaving metalloproteinase outer membrane protein OS=Pseudomonas aeruginosa (strain ATCC 15692 / DSM 22644 / CIP 104116 / JCM 14847 / LMG 12228 / 1C / PRS 101 / PAO1) GN=icmP PE=4 SV=1	47.23	5.5019	157420	0	0	0	1	5.4	5585.4	1	5.4	3598.7	1	5.4	24719
Q9HW49	tr|Q9HW49|Q9HW49_PSEAE Uncharacterized protein OS=Pseudomonas aeruginosa (strain ATCC 15692 / DSM 22644 / CIP 104116 / JCM 14847 / LMG 12228 / 1C / PRS 101 / PAO1) GN=PA4352 PE=3 SV=1	30.972	35.249	9177400	0	0	0	5	31.5	3969800	3	19.6	491400	5	31.5	3936100
Q9HW68	tr|Q9HW68|Q9HW68_PSEAE Fumarate hydratase class I OS=Pseudomonas aeruginosa (strain ATCC 15692 / DSM 22644 / CIP 104116 / JCM 14847 / LMG 12228 / 1C / PRS 101 / PAO1) GN=PA4333 PE=3 SV=1	54.763	20.749	3327000	1	4.1	19706	4	14.6	1279900	0	0	0	6	18.9	1771300
Q9HW72	tr|Q9HW72|Q9HW72_PSEAE Pyruvate kinase OS=Pseudomonas aeruginosa (strain ATCC 15692 / DSM 22644 / CIP 104116 / JCM 14847 / LMG 12228 / 1C / PRS 101 / PAO1) GN=pykA PE=3 SV=1	52.252	1.8459	1352700	0	0	0	1	5.6	260520	1	5.6	44286	2	12.6	760320
Q9HW79	tr|Q9HW79|Q9HW79_PSEAE Uncharacterized protein OS=Pseudomonas aeruginosa (strain ATCC 15692 / DSM 22644 / CIP 104116 / JCM 14847 / LMG 12228 / 1C / PRS 101 / PAO1) GN=PA4322 PE=4 SV=1	36.661	27.165	59351	0	0	0	0	0	0	0	0	0	1	5.4	59351
Q9HW86	tr|Q9HW86|Q9HW86_PSEAE MvaT OS=Pseudomonas aeruginosa (strain ATCC 15692 / DSM 22644 / CIP 104116 / JCM 14847 / LMG 12228 / 1C / PRS 101 / PAO1) GN=mvaT PE=1 SV=1	14.18	2.0107	1583900	0	0	0	1	8.9	1011900	1	8.9	571990	0	0	0
Q9HWC4	sp|Q9HWC4|NUSG_PSEAE Transcription termination/antitermination protein NusG OS=Pseudomonas aeruginosa (strain ATCC 15692 / DSM 22644 / CIP 104116 / JCM 14847 / LMG 12228 / 1C / PRS 101 / PAO1) GN=nusG PE=3 SV=1	20.162	29.126	1871900	0	0	0	1	11.3	878230	1	11.3	407460	1	11.3	586220
Q9HWC5	sp|Q9HWC5|RL11_PSEAE 50S ribosomal protein L11 OS=Pseudomonas aeruginosa (strain ATCC 15692 / DSM 22644 / CIP 104116 / JCM 14847 / LMG 12228 / 1C / PRS 101 / PAO1) GN=rplK PE=3 SV=1	14.907	10.889	8304700	0	0	0	2	23.8	1937100	2	23.8	494290	2	23.8	4150100
Q9HWC6	sp|Q9HWC6|RL1_PSEAE 50S ribosomal protein L1 OS=Pseudomonas aeruginosa (strain ATCC 15692 / DSM 22644 / CIP 104116 / JCM 14847 / LMG 12228 / 1C / PRS 101 / PAO1) GN=rplA PE=3 SV=1	24.234	34.174	13836000	0	0	0	6	34.2	3251100	7	34.2	3256300	6	34.2	5962600
Q9HWC7	sp|Q9HWC7|RL10_PSEAE 50S ribosomal protein L10 OS=Pseudomonas aeruginosa (strain ATCC 15692 / DSM 22644 / CIP 104116 / JCM 14847 / LMG 12228 / 1C / PRS 101 / PAO1) GN=rplJ PE=3 SV=1	17.634	10.233	8540300	0	0	0	3	25.9	3438300	3	25.9	1218200	2	16.9	2312600
Q9HWC8	sp|Q9HWC8|RL7_PSEAE 50S ribosomal protein L7/L12 OS=Pseudomonas aeruginosa (strain ATCC 15692 / DSM 22644 / CIP 104116 / JCM 14847 / LMG 12228 / 1C / PRS 101 / PAO1) GN=rplL PE=3 SV=1	12.479	26.665	25600000	2	50	187530	2	28.7	3232400	3	59	17278000	2	28.7	4450200
Q9HWC9	sp|Q9HWC9|RPOC_PSEAE DNA-directed RNA polymerase subunit beta OS=Pseudomonas aeruginosa (strain ATCC 15692 / DSM 22644 / CIP 104116 / JCM 14847 / LMG 12228 / 1C / PRS 101 / PAO1) GN=rpoC PE=3 SV=1	154.38	115.08	12087000	2	1.9	6723	28	27.6	4182000	10	11.5	350390	27	27.6	4780100
Q9HWD1	sp|Q9HWD1|RS7_PSEAE 30S ribosomal protein S7 OS=Pseudomonas aeruginosa (strain ATCC 15692 / DSM 22644 / CIP 104116 / JCM 14847 / LMG 12228 / 1C / PRS 101 / PAO1) GN=rpsG PE=3 SV=1	17.504	2.8601	6204300	0	0	0	2	15.4	1607900	0	0	0	2	15.4	3245100
Q9HWD2;Q9I244	sp|Q9HWD2|EFG1_PSEAE Elongation factor G 1 OS=Pseudomonas aeruginosa (strain ATCC 15692 / DSM 22644 / CIP 104116 / JCM 14847 / LMG 12228 / 1C / PRS 101 / PAO1) GN=fusA PE=1 SV=1	77.784	155.24	35672000	4	9.9	97751	26	55.5	11896000	19	43.5	1915800	26	57.6	14337000
Q9HWD5	sp|Q9HWD5|RL3_PSEAE 50S ribosomal protein L3 OS=Pseudomonas aeruginosa (strain ATCC 15692 / DSM 22644 / CIP 104116 / JCM 14847 / LMG 12228 / 1C / PRS 101 / PAO1) GN=rplC PE=3 SV=1	22.591	15.893	5529000	0	0	0	2	14.2	1172800	1	4.7	178700	2	14.2	3135300
Q9HWD6	sp|Q9HWD6|RL4_PSEAE 50S ribosomal protein L4 OS=Pseudomonas aeruginosa (strain ATCC 15692 / DSM 22644 / CIP 104116 / JCM 14847 / LMG 12228 / 1C / PRS 101 / PAO1) GN=rplD PE=3 SV=1	21.64	2.9715	41672	1	6.5	41672	0	0	0	0	0	0	0	0	0
Q9HWD8	sp|Q9HWD8|RL2_PSEAE 50S ribosomal protein L2 OS=Pseudomonas aeruginosa (strain ATCC 15692 / DSM 22644 / CIP 104116 / JCM 14847 / LMG 12228 / 1C / PRS 101 / PAO1) GN=rplB PE=3 SV=1	29.579	22.934	14882000	0	0	0	3	15.4	1216100	2	11.4	455590	4	19.4	4573800
Q9HWD9	sp|Q9HWD9|RS19_PSEAE 30S ribosomal protein S19 OS=Pseudomonas aeruginosa (strain ATCC 15692 / DSM 22644 / CIP 104116 / JCM 14847 / LMG 12228 / 1C / PRS 101 / PAO1) GN=rpsS PE=3 SV=1	10.357	1.6993	1159700	0	0	0	2	20.9	153290	1	12.1	62806	0	0	0
Q9HWE0	sp|Q9HWE0|RL22_PSEAE 50S ribosomal protein L22 OS=Pseudomonas aeruginosa (strain ATCC 15692 / DSM 22644 / CIP 104116 / JCM 14847 / LMG 12228 / 1C / PRS 101 / PAO1) GN=rplV PE=3 SV=1	11.911	1.4671	7119700	0	0	0	1	11.8	2387400	1	11.8	721920	1	11.8	2773600
Q9HWE1	sp|Q9HWE1|RS3_PSEAE 30S ribosomal protein S3 OS=Pseudomonas aeruginosa (strain ATCC 15692 / DSM 22644 / CIP 104116 / JCM 14847 / LMG 12228 / 1C / PRS 101 / PAO1) GN=rpsC PE=3 SV=1	25.838	4.5048	7673600	1	8.8	9068.1	3	21.9	2881200	2	17.1	333560	3	21.9	3677600
Q9HWE2	sp|Q9HWE2|RL16_PSEAE 50S ribosomal protein L16 OS=Pseudomonas aeruginosa (strain ATCC 15692 / DSM 22644 / CIP 104116 / JCM 14847 / LMG 12228 / 1C / PRS 101 / PAO1) GN=rplP PE=3 SV=1	15.401	3.3367	9704700	0	0	0	2	16.8	1681900	2	16.8	1054800	2	16.8	3602000
Q9HWE3	sp|Q9HWE3|RL29_PSEAE 50S ribosomal protein L29 OS=Pseudomonas aeruginosa (strain ATCC 15692 / DSM 22644 / CIP 104116 / JCM 14847 / LMG 12228 / 1C / PRS 101 / PAO1) GN=rpmC PE=1 SV=1	7.2013	6.7769	4914900	0	0	0	0	0	0	1	22.2	1371300	1	22.2	1748800
Q9HWE4	sp|Q9HWE4|RS17_PSEAE 30S ribosomal protein S17 OS=Pseudomonas aeruginosa (strain ATCC 15692 / DSM 22644 / CIP 104116 / JCM 14847 / LMG 12228 / 1C / PRS 101 / PAO1) GN=rpsQ PE=3 SV=1	10.086	3.3869	6297200	0	0	0	1	11.4	2019100	1	11.4	496340	1	11.4	2373700
Q9HWE5	sp|Q9HWE5|RL14_PSEAE 50S ribosomal protein L14 OS=Pseudomonas aeruginosa (strain ATCC 15692 / DSM 22644 / CIP 104116 / JCM 14847 / LMG 12228 / 1C / PRS 101 / PAO1) GN=rplN PE=3 SV=1	13.412	33.124	7722000	0	0	0	3	25.4	957500	3	31.1	342500	3	31.1	3082600
Q9HWE6	sp|Q9HWE6|RL24_PSEAE 50S ribosomal protein L24 OS=Pseudomonas aeruginosa (strain ATCC 15692 / DSM 22644 / CIP 104116 / JCM 14847 / LMG 12228 / 1C / PRS 101 / PAO1) GN=rplX PE=3 SV=1	11.47	2.1093	4747400	0	0	0	0	0	0	1	9.6	2075000	1	9.6	1182600
Q9HWE7	sp|Q9HWE7|RL5_PSEAE 50S ribosomal protein L5 OS=Pseudomonas aeruginosa (strain ATCC 15692 / DSM 22644 / CIP 104116 / JCM 14847 / LMG 12228 / 1C / PRS 101 / PAO1) GN=rplE PE=3 SV=1	20.392	4.9425	6552100	1	6.1	17456	3	14.5	1451900	2	10.6	273400	4	20.7	3462600
Q9HWE8	sp|Q9HWE8|RS14_PSEAE 30S ribosomal protein S14 OS=Pseudomonas aeruginosa (strain ATCC 15692 / DSM 22644 / CIP 104116 / JCM 14847 / LMG 12228 / 1C / PRS 101 / PAO1) GN=rpsN PE=3 SV=1	11.565	3.2649	16880000	0	0	0	1	8.9	1345000	2	21.8	632820	1	8.9	4927800
Q9HWE9	sp|Q9HWE9|RS8_PSEAE 30S ribosomal protein S8 OS=Pseudomonas aeruginosa (strain ATCC 15692 / DSM 22644 / CIP 104116 / JCM 14847 / LMG 12228 / 1C / PRS 101 / PAO1) GN=rpsH PE=3 SV=1	14.17	1.9999	3578700	0	0	0	2	19.2	693460	1	9.2	73626	2	19.2	2078600
Q9HWF1	sp|Q9HWF1|RL18_PSEAE 50S ribosomal protein L18 OS=Pseudomonas aeruginosa (strain ATCC 15692 / DSM 22644 / CIP 104116 / JCM 14847 / LMG 12228 / 1C / PRS 101 / PAO1) GN=rplR PE=3 SV=1	12.661	2.3554	2020200	0	0	0	1	9.5	423420	0	0	0	1	9.5	1351100
Q9HWF2	sp|Q9HWF2|RS5_PSEAE 30S ribosomal protein S5 OS=Pseudomonas aeruginosa (strain ATCC 15692 / DSM 22644 / CIP 104116 / JCM 14847 / LMG 12228 / 1C / PRS 101 / PAO1) GN=rpsE PE=3 SV=1	17.625	13.535	9867200	0	0	0	3	30.1	1816300	2	19.9	409650	3	30.1	5485100
Q9HWF3	sp|Q9HWF3|RL30_PSEAE 50S ribosomal protein L30 OS=Pseudomonas aeruginosa (strain ATCC 15692 / DSM 22644 / CIP 104116 / JCM 14847 / LMG 12228 / 1C / PRS 101 / PAO1) GN=rpmD PE=1 SV=3	6.4775	1.4547	3487700	0	0	0	1	24.1	46076	1	24.1	58254	1	24.1	108400
Q9HWF4	sp|Q9HWF4|RL15_PSEAE 50S ribosomal protein L15 OS=Pseudomonas aeruginosa (strain ATCC 15692 / DSM 22644 / CIP 104116 / JCM 14847 / LMG 12228 / 1C / PRS 101 / PAO1) GN=rplO PE=3 SV=1	15.174	5.4054	6573900	0	0	0	1	8.3	373360	3	22.2	936670	2	16	1754100
Q9HWF7	sp|Q9HWF7|RS13_PSEAE 30S ribosomal protein S13 OS=Pseudomonas aeruginosa (strain ATCC 15692 / DSM 22644 / CIP 104116 / JCM 14847 / LMG 12228 / 1C / PRS 101 / PAO1) GN=rpsM PE=3 SV=1	13.265	11.877	2005000	0	0	0	1	14.4	0	0	0	0	1	14.4	877920
Q9HWF8	sp|Q9HWF8|RS11_PSEAE 30S ribosomal protein S11 OS=Pseudomonas aeruginosa (strain ATCC 15692 / DSM 22644 / CIP 104116 / JCM 14847 / LMG 12228 / 1C / PRS 101 / PAO1) GN=rpsK PE=3 SV=1	13.629	2.0489	3337300	0	0	0	0	0	0	1	12.4	392660	1	12.4	1553000
Q9HWG9	tr|Q9HWG9|Q9HWG9_PSEAE Flavin-containing monooxygenase OS=Pseudomonas aeruginosa (strain ATCC 15692 / DSM 22644 / CIP 104116 / JCM 14847 / LMG 12228 / 1C / PRS 101 / PAO1) GN=phzS PE=1 SV=1	43.644	25.052	2368000	0	0	0	5	22.9	827770	2	8.2	88319	4	18.2	1451900
Q9HWI2	tr|Q9HWI2|Q9HWI2_PSEAE Probable acyl-CoA dehydrogenase OS=Pseudomonas aeruginosa (strain ATCC 15692 / DSM 22644 / CIP 104116 / JCM 14847 / LMG 12228 / 1C / PRS 101 / PAO1) GN=PA4199 PE=3 SV=1	63.926	2.7671	878280	0	0	0	2	9.3	538370	0	0	0	1	3.5	295810
Q9HWL3	tr|Q9HWL3|Q9HWL3_PSEAE Second ferric pyoverdine receptor FpvB OS=Pseudomonas aeruginosa (strain ATCC 15692 / DSM 22644 / CIP 104116 / JCM 14847 / LMG 12228 / 1C / PRS 101 / PAO1) GN=fpvB PE=3 SV=1	87.43	-2	354200	0	0	0	0	0	0	1	1.9	161490	0	0	0
Q9HWL8	tr|Q9HWL8|Q9HWL8_PSEAE Uncharacterized protein OS=Pseudomonas aeruginosa (strain ATCC 15692 / DSM 22644 / CIP 104116 / JCM 14847 / LMG 12228 / 1C / PRS 101 / PAO1) GN=PA4163 PE=4 SV=1	60.494	12.531	331890	0	0	0	5	8.6	274970	0	0	0	2	2.6	56923
Q9HWQ0	tr|Q9HWQ0|Q9HWQ0_PSEAE Probable iron-sulfur protein OS=Pseudomonas aeruginosa (strain ATCC 15692 / DSM 22644 / CIP 104116 / JCM 14847 / LMG 12228 / 1C / PRS 101 / PAO1) GN=PA4131 PE=4 SV=1	63.991	28.608	4655200	1	3.3	9447.7	6	14.8	1030400	4	10.3	165290	6	14.8	2764100
Q9HWQ1	tr|Q9HWQ1|Q9HWQ1_PSEAE Probable sulfite or nitrite reductase OS=Pseudomonas aeruginosa (strain ATCC 15692 / DSM 22644 / CIP 104116 / JCM 14847 / LMG 12228 / 1C / PRS 101 / PAO1) GN=PA4130 PE=3 SV=1	62.16	12.647	182460	0	0	0	1	2.3	11851	0	0	0	2	3.9	170600
Q9HWQ2	tr|Q9HWQ2|Q9HWQ2_PSEAE Uncharacterized protein OS=Pseudomonas aeruginosa (strain ATCC 15692 / DSM 22644 / CIP 104116 / JCM 14847 / LMG 12228 / 1C / PRS 101 / PAO1) GN=PA4129 PE=4 SV=1	18.122	3.2305	1863300	0	0	0	1	13	815580	0	0	0	1	13	1047700
Q9HWV0	tr|Q9HWV0|Q9HWV0_PSEAE Probable nonribosomal peptide synthetase OS=Pseudomonas aeruginosa (strain ATCC 15692 / DSM 22644 / CIP 104116 / JCM 14847 / LMG 12228 / 1C / PRS 101 / PAO1) GN=PA4078 PE=4 SV=1	110.35	3.3705	652610	0	0	0	2	3.2	237130	0	0	0	3	4.6	410820
Q9HWW1	tr|Q9HWW1|Q9HWW1_PSEAE Outer membrane protein OprG OS=Pseudomonas aeruginosa (strain ATCC 15692 / DSM 22644 / CIP 104116 / JCM 14847 / LMG 12228 / 1C / PRS 101 / PAO1) GN=oprG PE=1 SV=1	25.193	108	85958000	1	8.6	47156	6	30.6	13301000	6	30.6	5076900	6	30.6	28627000
Q9HWY6	tr|Q9HWY6|Q9HWY6_PSEAE Uncharacterized protein OS=Pseudomonas aeruginosa (strain ATCC 15692 / DSM 22644 / CIP 104116 / JCM 14847 / LMG 12228 / 1C / PRS 101 / PAO1) GN=PA4041 PE=4 SV=1	42.118	-2	115740	0	0	0	0	0	0	0	0	0	1	5.4	115740
Q9I2C4;Q9HX05	tr|Q9I2C4|Q9I2C4_PSEAE NAD+ dependent aldehyde dehydrogenase ExaC OS=Pseudomonas aeruginosa (strain ATCC 15692 / DSM 22644 / CIP 104116 / JCM 14847 / LMG 12228 / 1C / PRS 101 / PAO1) GN=exaC PE=3 SV=1;tr|Q9HX05|Q9HX05_PSEAE Probable aldehyde dehydrogenase	54.892	0.95931	1457600	0	0	0	2	6.1	478770	1	2.8	81718	2	6.1	541870
Q9HX12	tr|Q9HX12|Q9HX12_PSEAE Uncharacterized protein OS=Pseudomonas aeruginosa (strain ATCC 15692 / DSM 22644 / CIP 104116 / JCM 14847 / LMG 12228 / 1C / PRS 101 / PAO1) GN=PA4015 PE=4 SV=1	16.7	3.4326	257650	0	0	0	0	0	0	0	0	0	0	0	0
Q9HX33	sp|Q9HX33|SYL_PSEAE Leucine--tRNA ligase OS=Pseudomonas aeruginosa (strain ATCC 15692 / DSM 22644 / CIP 104116 / JCM 14847 / LMG 12228 / 1C / PRS 101 / PAO1) GN=leuS PE=3 SV=1	97.647	27.997	803140	1	2.6	8914.9	4	7.6	216530	0	0	0	4	7.6	323080
Q9HX44	tr|Q9HX44|Q9HX44_PSEAE Probable acyl-CoA dehydrogenase OS=Pseudomonas aeruginosa (strain ATCC 15692 / DSM 22644 / CIP 104116 / JCM 14847 / LMG 12228 / 1C / PRS 101 / PAO1) GN=PA3972 PE=3 SV=1	60.338	9.6331	1228500	2	5.5	7540.2	2	8.4	418960	1	5.1	30860	3	10.2	771100
Q9HX46	tr|Q9HX46|Q9HX46_PSEAE AMP nucleosidase OS=Pseudomonas aeruginosa (strain ATCC 15692 / DSM 22644 / CIP 104116 / JCM 14847 / LMG 12228 / 1C / PRS 101 / PAO1) GN=amn PE=3 SV=1	56.225	1.1681	253460	0	0	0	1	5.8	131610	1	5.8	38642	1	5.8	58140
Q9HX76	tr|Q9HX76|Q9HX76_PSEAE Probable DNA binding protein OS=Pseudomonas aeruginosa (strain ATCC 15692 / DSM 22644 / CIP 104116 / JCM 14847 / LMG 12228 / 1C / PRS 101 / PAO1) GN=PA3940 PE=3 SV=1	9.8923	6.4192	5682500	0	0	0	0	0	0	2	33.3	5682500	0	0	0
Q9HX91	sp|Q9HX91|Y3922_PSEAE Uncharacterized protein PA3922 OS=Pseudomonas aeruginosa (strain ATCC 15692 / DSM 22644 / CIP 104116 / JCM 14847 / LMG 12228 / 1C / PRS 101 / PAO1) GN=PA3922 PE=1 SV=1	51.229	1.5989	41718	0	0	0	0	0	0	0	0	0	0	0	0
Q9HXD9	tr|Q9HXD9|Q9HXD9_PSEAE Probable DNA invertase OS=Pseudomonas aeruginosa (strain ATCC 15692 / DSM 22644 / CIP 104116 / JCM 14847 / LMG 12228 / 1C / PRS 101 / PAO1) GN=PA3867 PE=4 SV=1	21.487	-2	0	0	0	0	0	0	0	0	0	0	0	0	0
Q9HXE4	sp|Q9HXE4|DAUB_PSEAE NAD(P)H-dependent anabolic L-arginine dehydrogenase DauB OS=Pseudomonas aeruginosa (strain ATCC 15692 / DSM 22644 / CIP 104116 / JCM 14847 / LMG 12228 / 1C / PRS 101 / PAO1) GN=dauB PE=1 SV=1	33.945	3.1323	3120800	0	0	0	3	16.5	653510	0	0	0	3	16.5	1473100
Q9HXH0	sp|Q9HXH0|SYV_PSEAE Valine--tRNA ligase OS=Pseudomonas aeruginosa (strain ATCC 15692 / DSM 22644 / CIP 104116 / JCM 14847 / LMG 12228 / 1C / PRS 101 / PAO1) GN=valS PE=1 SV=1	107.71	10.676	713660	1	1.5	3075.5	2	4.7	249750	1	3.4	25559	3	7.1	435270
Q9HXI2	sp|Q9HXI2|SECF_PSEAE Protein translocase subunit SecF OS=Pseudomonas aeruginosa (strain ATCC 15692 / DSM 22644 / CIP 104116 / JCM 14847 / LMG 12228 / 1C / PRS 101 / PAO1) GN=secF PE=3 SV=1	33.041	4.9866	549520	0	0	0	1	5.6	141170	0	0	0	1	5.6	408350
Q9HXI3	tr|Q9HXI3|Q9HXI3_PSEAE Uncharacterized protein OS=Pseudomonas aeruginosa (strain ATCC 15692 / DSM 22644 / CIP 104116 / JCM 14847 / LMG 12228 / 1C / PRS 101 / PAO1) GN=PA3819 PE=4 SV=1	18.972	-2	648500	0	0	0	0	0	0	0	0	0	0	0	0
Q9HXJ5	sp|Q9HXJ5|SYH_PSEAE Histidine--tRNA ligase OS=Pseudomonas aeruginosa (strain ATCC 15692 / DSM 22644 / CIP 104116 / JCM 14847 / LMG 12228 / 1C / PRS 101 / PAO1) GN=hisS PE=3 SV=1	47.512	6.0437	793070	0	0	0	2	5.8	318980	0	0	0	2	5.8	474080
Q9HXM6	sp|Q9HXM6|GUAA_PSEAE GMP synthase [glutamine-hydrolyzing] OS=Pseudomonas aeruginosa (strain ATCC 15692 / DSM 22644 / CIP 104116 / JCM 14847 / LMG 12228 / 1C / PRS 101 / PAO1) GN=guaA PE=3 SV=1	57.959	13.112	2082600	2	6.9	26657	4	12	576820	1	3.4	89826	4	12	913340
Q9HXN2	sp|Q9HXN2|PUR4_PSEAE Phosphoribosylformylglycinamidine synthase OS=Pseudomonas aeruginosa (strain ATCC 15692 / DSM 22644 / CIP 104116 / JCM 14847 / LMG 12228 / 1C / PRS 101 / PAO1) GN=purL PE=3 SV=1	140.65	32.937	370310	0	0	0	3	4.8	107180	0	0	0	3	4.8	218960
Q9HXP9	sp|Q9HXP9|RS16_PSEAE 30S ribosomal protein S16 OS=Pseudomonas aeruginosa (strain ATCC 15692 / DSM 22644 / CIP 104116 / JCM 14847 / LMG 12228 / 1C / PRS 101 / PAO1) GN=rpsP PE=3 SV=1	9.2043	2.242	7228200	0	0	0	1	16.9	1519900	1	16.9	879780	1	16.9	2155200
Q9HXQ2	sp|Q9HXQ2|RL19_PSEAE 50S ribosomal protein L19 OS=Pseudomonas aeruginosa (strain ATCC 15692 / DSM 22644 / CIP 104116 / JCM 14847 / LMG 12228 / 1C / PRS 101 / PAO1) GN=rplS PE=3 SV=1	13.032	14.463	1442200	0	0	0	1	10.3	285100	2	18.1	0	1	10.3	1157100
Q9HXR8	tr|Q9HXR8|Q9HXR8_PSEAE Probable FMN oxidoreductase OS=Pseudomonas aeruginosa (strain ATCC 15692 / DSM 22644 / CIP 104116 / JCM 14847 / LMG 12228 / 1C / PRS 101 / PAO1) GN=PA3723 PE=4 SV=1	40.318	1.5537	37435	1	5.4	37435	0	0	0	0	0	0	0	0	0
Q9HXU8	tr|Q9HXU8|Q9HXU8_PSEAE Lipotoxon F, LptF OS=Pseudomonas aeruginosa (strain ATCC 15692 / DSM 22644 / CIP 104116 / JCM 14847 / LMG 12228 / 1C / PRS 101 / PAO1) GN=lptF PE=3 SV=1	28.514	28.817	2654800	0	0	0	4	16.9	668320	3	16.5	351950	4	16.9	974270
Q9HXV4	sp|Q9HXV4|KAD_PSEAE Adenylate kinase OS=Pseudomonas aeruginosa (strain ATCC 15692 / DSM 22644 / CIP 104116 / JCM 14847 / LMG 12228 / 1C / PRS 101 / PAO1) GN=adk PE=3 SV=1	23.107	13.45	704800	0	0	0	1	8.8	160120	2	14	194790	2	14	349890
Q9HXY1	tr|Q9HXY1|Q9HXY1_PSEAE Methionine aminopeptidase OS=Pseudomonas aeruginosa (strain ATCC 15692 / DSM 22644 / CIP 104116 / JCM 14847 / LMG 12228 / 1C / PRS 101 / PAO1) GN=map PE=1 SV=1	29.086	-2	1724500	0	0	0	1	5	36289	1	5	6480.1	1	5	23455
Q9HXY5	sp|Q9HXY5|SKPL_PSEAE Skp-like protein OS=Pseudomonas aeruginosa (strain ATCC 15692 / DSM 22644 / CIP 104116 / JCM 14847 / LMG 12228 / 1C / PRS 101 / PAO1) GN=PA3647 PE=3 SV=1	19.09	12.569	586670	0	0	0	0	0	0	2	16.7	586670	0	0	0
Q9HXZ2	sp|Q9HXZ2|ACCA_PSEAE Acetyl-coenzyme A carboxylase carboxyl transferase subunit alpha OS=Pseudomonas aeruginosa (strain ATCC 15692 / DSM 22644 / CIP 104116 / JCM 14847 / LMG 12228 / 1C / PRS 101 / PAO1) GN=accA PE=1 SV=1	34.947	3.0277	1283700	0	0	0	1	5.1	226870	1	5.1	65350	1	5.1	649130
Q9HXZ4	sp|Q9HXZ4|PYRG_PSEAE CTP synthase OS=Pseudomonas aeruginosa (strain ATCC 15692 / DSM 22644 / CIP 104116 / JCM 14847 / LMG 12228 / 1C / PRS 101 / PAO1) GN=pyrG PE=3 SV=1	59.617	25.151	4425500	1	2.6	7953.3	6	19.7	1082500	3	11.1	88714	6	19.6	2176800
Q9HXZ5	sp|Q9HXZ5|ENO_PSEAE Enolase OS=Pseudomonas aeruginosa (strain ATCC 15692 / DSM 22644 / CIP 104116 / JCM 14847 / LMG 12228 / 1C / PRS 101 / PAO1) GN=eno PE=3 SV=1	45.195	57.281	7125500	0	0	0	5	22.8	2100300	4	20.7	684610	5	22.8	3765200
Q9HY13	tr|Q9HY13|Q9HY13_PSEAE Uncharacterized protein OS=Pseudomonas aeruginosa (strain ATCC 15692 / DSM 22644 / CIP 104116 / JCM 14847 / LMG 12228 / 1C / PRS 101 / PAO1) GN=PA3613 PE=4 SV=1	88.378	11.536	4126300	0	0	0	6	15	986460	2	3.5	44646	8	18.1	2725800
Q9HY77	tr|Q9HY77|Q9HY77_PSEAE Glutaredoxin OS=Pseudomonas aeruginosa (strain ATCC 15692 / DSM 22644 / CIP 104116 / JCM 14847 / LMG 12228 / 1C / PRS 101 / PAO1) GN=PA3533 PE=3 SV=1	11.843	6.8065	8710400	0	0	0	2	19.4	1332200	0	0	0	3	31.5	7378200
Q9HY79	tr|Q9HY79|Q9HY79_PSEAE Bacterioferritin OS=Pseudomonas aeruginosa (strain ATCC 15692 / DSM 22644 / CIP 104116 / JCM 14847 / LMG 12228 / 1C / PRS 101 / PAO1) GN=bfrB PE=1 SV=1	18.553	1.8139	5759400	0	0	0	1	9.5	2134800	1	9.5	241340	1	9.5	1795200
Q9HY81	tr|Q9HY81|Q9HY81_PSEAE Probable peroxidase OS=Pseudomonas aeruginosa (strain ATCC 15692 / DSM 22644 / CIP 104116 / JCM 14847 / LMG 12228 / 1C / PRS 101 / PAO1) GN=PA3529 PE=1 SV=1	21.822	22.034	29697000	3	29.5	78014	7	51	6523700	8	54.5	4029400	9	68	11375000
Q9HYA0	tr|Q9HYA0|Q9HYA0_PSEAE Probable hydrolase OS=Pseudomonas aeruginosa (strain ATCC 15692 / DSM 22644 / CIP 104116 / JCM 14847 / LMG 12228 / 1C / PRS 101 / PAO1) GN=PA3509 PE=4 SV=1	30.403	1.0359	88119	1	5.5	88119	0	0	0	0	0	0	0	0	0
Q9HYB3	tr|Q9HYB3|Q9HYB3_PSEAE Uncharacterized protein OS=Pseudomonas aeruginosa (strain ATCC 15692 / DSM 22644 / CIP 104116 / JCM 14847 / LMG 12228 / 1C / PRS 101 / PAO1) GN=PA3496 PE=4 SV=1	6.8834	2.6907	1349200	0	0	0	0	0	0	1	15.3	1349200	0	0	0
Q9HYC7	sp|Q9HYC7|SYM_PSEAE Methionine--tRNA ligase OS=Pseudomonas aeruginosa (strain ATCC 15692 / DSM 22644 / CIP 104116 / JCM 14847 / LMG 12228 / 1C / PRS 101 / PAO1) GN=metG PE=3 SV=1	74.903	3.4358	760720	0	0	0	2	4.1	255570	0	0	0	2	4.1	446970
Q9HYD5	sp|Q9HYD5|MAO1_PSEAE NAD-dependent malic enzyme OS=Pseudomonas aeruginosa (strain ATCC 15692 / DSM 22644 / CIP 104116 / JCM 14847 / LMG 12228 / 1C / PRS 101 / PAO1) GN=maeA PE=3 SV=1	62.42	6.5564	2816900	0	0	0	3	8.5	1199400	0	0	0	3	8.5	1617500
Q9HYI7	tr|Q9HYI7|Q9HYI7_PSEAE Leucine dehydrogenase OS=Pseudomonas aeruginosa (strain ATCC 15692 / DSM 22644 / CIP 104116 / JCM 14847 / LMG 12228 / 1C / PRS 101 / PAO1) GN=ldh PE=3 SV=1	35.633	1.7329	18320	0	0	0	0	0	0	0	0	0	0	0	0
Q9HYK7	tr|Q9HYK7|Q9HYK7_PSEAE Ferredoxin--NADP+ reductase OS=Pseudomonas aeruginosa (strain ATCC 15692 / DSM 22644 / CIP 104116 / JCM 14847 / LMG 12228 / 1C / PRS 101 / PAO1) GN=fpr PE=1 SV=1	29.517	27.929	6526600	1	5	12504	5	27.9	3024900	1	6.2	166300	5	27.9	2723500
Q9HYP0	tr|Q9HYP0|Q9HYP0_PSEAE Uncharacterized protein OS=Pseudomonas aeruginosa (strain ATCC 15692 / DSM 22644 / CIP 104116 / JCM 14847 / LMG 12228 / 1C / PRS 101 / PAO1) GN=PA3356 PE=3 SV=1	45.161	6.5384	2558500	0	0	0	4	17.2	1577300	0	0	0	3	12.3	981250
Q9HYR2	sp|Q9HYR2|FABH_PSEAE 3-oxoacyl-[acyl-carrier-protein] synthase 3 OS=Pseudomonas aeruginosa (strain ATCC 15692 / DSM 22644 / CIP 104116 / JCM 14847 / LMG 12228 / 1C / PRS 101 / PAO1) GN=fabH PE=1 SV=1	34.003	2.9255	986080	0	0	0	0	0	0	0	0	0	2	7.9	986080
Q9HYR3	sp|Q9HYR3|Y3332_PSEAE Uncharacterized PhzA/B-like protein PA3332 OS=Pseudomonas aeruginosa (strain ATCC 15692 / DSM 22644 / CIP 104116 / JCM 14847 / LMG 12228 / 1C / PRS 101 / PAO1) GN=PA3332 PE=1 SV=1	15.92	10.569	12066000	0	0	0	4	37.6	4623300	4	37.6	972480	3	31.9	2015700
Q9HYR4	tr|Q9HYR4|Q9HYR4_PSEAE Cytochrome P450 OS=Pseudomonas aeruginosa (strain ATCC 15692 / DSM 22644 / CIP 104116 / JCM 14847 / LMG 12228 / 1C / PRS 101 / PAO1) GN=PA3331 PE=3 SV=1	46.377	3.6659	855470	0	0	0	1	5.3	345360	0	0	0	1	5.3	510110
Q9HYR6	tr|Q9HYR6|Q9HYR6_PSEAE Uncharacterized protein OS=Pseudomonas aeruginosa (strain ATCC 15692 / DSM 22644 / CIP 104116 / JCM 14847 / LMG 12228 / 1C / PRS 101 / PAO1) GN=PA3329 PE=4 SV=1	49.134	6.5596	324200	0	0	0	1	3.2	83819	0	0	0	1	3.2	240380
Q9HYR8	tr|Q9HYR8|Q9HYR8_PSEAE Probable non-ribosomal peptide synthetase OS=Pseudomonas aeruginosa (strain ATCC 15692 / DSM 22644 / CIP 104116 / JCM 14847 / LMG 12228 / 1C / PRS 101 / PAO1) GN=PA3327 PE=4 SV=1	259.4	10.6	270380	0	0	0	4	5.1	133630	1	1.6	6366.5	3	3.5	130380
Q9HYR9	sp|Q9HYR9|CLPP2_PSEAE ATP-dependent Clp protease proteolytic subunit 2 OS=Pseudomonas aeruginosa (strain ATCC 15692 / DSM 22644 / CIP 104116 / JCM 14847 / LMG 12228 / 1C / PRS 101 / PAO1) GN=clpP2 PE=3 SV=1	22.142	3.6752	691890	0	0	0	1	6	159390	1	6	56549	1	6	382080
Q9HYT5	tr|Q9HYT5|Q9HYT5_PSEAE Uncharacterized protein OS=Pseudomonas aeruginosa (strain ATCC 15692 / DSM 22644 / CIP 104116 / JCM 14847 / LMG 12228 / 1C / PRS 101 / PAO1) GN=PA3309 PE=3 SV=1	16.496	20.766	42690000	1	13.2	69041	4	33.1	10650000	4	33.1	2452200	4	33.1	19255000
Q9HYX8	tr|Q9HYX8|Q9HYX8_PSEAE Peptidyl-prolyl cis-trans isomerase OS=Pseudomonas aeruginosa (strain ATCC 15692 / DSM 22644 / CIP 104116 / JCM 14847 / LMG 12228 / 1C / PRS 101 / PAO1) GN=PA3262 PE=3 SV=1	26.845	2.4872	2642500	0	0	0	3	21.7	1662300	0	0	0	2	15.4	980280
Q9HZ12	tr|Q9HZ12|Q9HZ12_PSEAE Probable ATP-binding/permease fusion ABC transporter OS=Pseudomonas aeruginosa (strain ATCC 15692 / DSM 22644 / CIP 104116 / JCM 14847 / LMG 12228 / 1C / PRS 101 / PAO1) GN=PA3228 PE=4 SV=1	67.793	1.2852	108200	0	0	0	1	5.4	76153	0	0	0	1	5.4	32051
Q9HZ21	tr|Q9HZ21|Q9HZ21_PSEAE Uncharacterized protein OS=Pseudomonas aeruginosa (strain ATCC 15692 / DSM 22644 / CIP 104116 / JCM 14847 / LMG 12228 / 1C / PRS 101 / PAO1) GN=PA3219 PE=4 SV=1	31.292	1.2111	465290	0	0	0	0	0	0	1	6.3	465290	0	0	0
Q9HZ65	sp|Q9HZ65|MTNA_PSEAE Methylthioribose-1-phosphate isomerase OS=Pseudomonas aeruginosa (strain ATCC 15692 / DSM 22644 / CIP 104116 / JCM 14847 / LMG 12228 / 1C / PRS 101 / PAO1) GN=mtnA PE=3 SV=1	39.425	-2	475580	0	0	0	0	0	0	1	4.2	411760	0	0	0
Q9HZ66	sp|Q9HZ66|SERC_PSEAE Phosphoserine aminotransferase OS=Pseudomonas aeruginosa (strain ATCC 15692 / DSM 22644 / CIP 104116 / JCM 14847 / LMG 12228 / 1C / PRS 101 / PAO1) GN=serC PE=1 SV=1	39.949	1.2443	91526	0	0	0	1	3	8231	0	0	0	1	3	34990
Q9HZ71	sp|Q9HZ71|RS1_PSEAE 30S ribosomal protein S1 OS=Pseudomonas aeruginosa (strain ATCC 15692 / DSM 22644 / CIP 104116 / JCM 14847 / LMG 12228 / 1C / PRS 101 / PAO1) GN=rpsA PE=3 SV=1	61.869	77.209	38181000	5	15.9	121990	16	49.2	13750000	9	23.4	1790100	14	42.2	15830000
Q9HZ76	sp|Q9HZ76|WBPE_PSEAE UDP-2-acetamido-2-deoxy-3-oxo-D-glucuronate aminotransferase OS=Pseudomonas aeruginosa (strain ATCC 15692 / DSM 22644 / CIP 104116 / JCM 14847 / LMG 12228 / 1C / PRS 101 / PAO1) GN=wbpE PE=1 SV=1	38.924	14.11	4159700	1	3.1	10467	3	12.8	1548500	1	3.3	116510	3	12.8	1973800
Q9HZ78	tr|Q9HZ78|Q9HZ78_PSEAE LPS biosynthesis protein WbpG OS=Pseudomonas aeruginosa (strain ATCC 15692 / DSM 22644 / CIP 104116 / JCM 14847 / LMG 12228 / 1C / PRS 101 / PAO1) GN=wbpG PE=4 SV=1	43.503	8.0039	5177800	0	0	0	3	12.7	2256200	0	0	0	3	12.7	2921600
Q9HZA7	sp|Q9HZA7|ACCD_PSEAE Acetyl-coenzyme A carboxylase carboxyl transferase subunit beta OS=Pseudomonas aeruginosa (strain ATCC 15692 / DSM 22644 / CIP 104116 / JCM 14847 / LMG 12228 / 1C / PRS 101 / PAO1) GN=accD PE=1 SV=1	31.843	3.7976	1139800	0	0	0	2	16.9	534230	1	12.4	35767	2	16.9	569790
Q9HZC5	tr|Q9HZC5|Q9HZC5_PSEAE Aminopeptidase N OS=Pseudomonas aeruginosa (strain ATCC 15692 / DSM 22644 / CIP 104116 / JCM 14847 / LMG 12228 / 1C / PRS 101 / PAO1) GN=pepN PE=4 SV=1	100.05	77.206	3329600	2	3.3	5038.7	12	27	1884500	0	0	0	10	24.1	1281800
Q9HZE0	sp|Q9HZE0|DHE2_PSEAE NAD-specific glutamate dehydrogenase OS=Pseudomonas aeruginosa (strain ATCC 15692 / DSM 22644 / CIP 104116 / JCM 14847 / LMG 12228 / 1C / PRS 101 / PAO1) GN=gdhB PE=1 SV=1	182.64	62.868	10043000	4	2.8	10702	23	20.6	2369400	9	9.2	508850	24	21.2	3792300
Q9HZF8	sp|Q9HZF8|PYRD_PSEAE Dihydroorotate dehydrogenase (quinone) OS=Pseudomonas aeruginosa (strain ATCC 15692 / DSM 22644 / CIP 104116 / JCM 14847 / LMG 12228 / 1C / PRS 101 / PAO1) GN=pyrD PE=3 SV=1	36.128	3.0306	262920	0	0	0	1	9.9	101420	1	9.9	28238	1	9.9	133270
Q9HZJ2	sp|Q9HZJ2|FADB_PSEAE Fatty acid oxidation complex subunit alpha OS=Pseudomonas aeruginosa (strain ATCC 15692 / DSM 22644 / CIP 104116 / JCM 14847 / LMG 12228 / 1C / PRS 101 / PAO1) GN=fadB PE=3 SV=1	76.953	65.453	4966500	2	4.5	17053	10	20.3	1520700	2	4.3	69799	9	17.3	2154200
Q9HZK3	tr|Q9HZK3|Q9HZK3_PSEAE Transcription-repair-coupling factor OS=Pseudomonas aeruginosa (strain ATCC 15692 / DSM 22644 / CIP 104116 / JCM 14847 / LMG 12228 / 1C / PRS 101 / PAO1) GN=mfd PE=3 SV=1	128.79	1.23	43347	0	0	0	1	1.2	4249.1	0	0	0	1	1.2	19049
Q9HZK4	tr|Q9HZK4|Q9HZK4_PSEAE Glyceraldehyde-3-phosphate dehydrogenase OS=Pseudomonas aeruginosa (strain ATCC 15692 / DSM 22644 / CIP 104116 / JCM 14847 / LMG 12228 / 1C / PRS 101 / PAO1) GN=PA3001 PE=3 SV=1	50.111	42.435	7424200	4	15.4	24104	6	20.4	2072200	3	11.1	258990	7	22.3	3682300
Q9HZM8	tr|Q9HZM8|Q9HZM8_PSEAE Ribonuclease E OS=Pseudomonas aeruginosa (strain ATCC 15692 / DSM 22644 / CIP 104116 / JCM 14847 / LMG 12228 / 1C / PRS 101 / PAO1) GN=rne PE=1 SV=1	117.46	13.958	9502200	2	3	90921	3	3.9	523370	2	2.7	1721600	5	6.7	7009000
Q9HZP6	sp|Q9HZP6|ETFB_PSEAE Electron transfer flavoprotein subunit beta OS=Pseudomonas aeruginosa (strain ATCC 15692 / DSM 22644 / CIP 104116 / JCM 14847 / LMG 12228 / 1C / PRS 101 / PAO1) GN=etfB PE=3 SV=1	26.376	16.219	4904100	0	0	0	1	8.8	1433300	1	8.8	258060	2	15.7	2033300
Q9HZP7	sp|Q9HZP7|ETFA_PSEAE Electron transfer flavoprotein subunit alpha OS=Pseudomonas aeruginosa (strain ATCC 15692 / DSM 22644 / CIP 104116 / JCM 14847 / LMG 12228 / 1C / PRS 101 / PAO1) GN=etfA PE=3 SV=1	31.422	9.8707	5449800	1	7.8	14024	4	25.2	2182200	2	14.6	283120	4	25.2	2323300
Q9HZQ5	tr|Q9HZQ5|Q9HZQ5_PSEAE Probable magnesium chelatase OS=Pseudomonas aeruginosa (strain ATCC 15692 / DSM 22644 / CIP 104116 / JCM 14847 / LMG 12228 / 1C / PRS 101 / PAO1) GN=PA2942 PE=4 SV=1	36.545	0.93859	60079	0	0	0	1	10.4	60079	0	0	0	0	0	0
Q9HZV6	tr|Q9HZV6|Q9HZV6_PSEAE Geranyl-CoA carboxylase, alpha-subunit (Biotin-containing) OS=Pseudomonas aeruginosa (strain ATCC 15692 / DSM 22644 / CIP 104116 / JCM 14847 / LMG 12228 / 1C / PRS 101 / PAO1) GN=atuF PE=4 SV=1	71.747	46.993	10955000	3	8	19564	12	34.3	2796700	3	8	138330	13	35.9	3920100
Q9HZZ2	sp|Q9HZZ2|EFP_PSEAE Elongation factor P OS=Pseudomonas aeruginosa (strain ATCC 15692 / DSM 22644 / CIP 104116 / JCM 14847 / LMG 12228 / 1C / PRS 101 / PAO1) GN=efp PE=1 SV=1	20.985	19.092	5762600	0	0	0	2	13.8	883750	1	8.5	362380	2	13.8	3217100
Q9I012	tr|Q9I012|Q9I012_PSEAE Uncharacterized protein OS=Pseudomonas aeruginosa (strain ATCC 15692 / DSM 22644 / CIP 104116 / JCM 14847 / LMG 12228 / 1C / PRS 101 / PAO1) GN=PA2831 PE=1 SV=1	42.933	4.2788	205440	0	0	0	1	4.5	87709	0	0	0	1	4.5	117730
Q9I028	tr|Q9I028|Q9I028_PSEAE Probable acyl-CoA dehydrogenase OS=Pseudomonas aeruginosa (strain ATCC 15692 / DSM 22644 / CIP 104116 / JCM 14847 / LMG 12228 / 1C / PRS 101 / PAO1) GN=PA2815 PE=4 SV=1	88.762	79.293	10739000	0	0	0	13	27.1	4329600	3	6.9	130730	13	27.1	5311000
Q9I047	sp|Q9I047|TAL_PSEAE Transaldolase OS=Pseudomonas aeruginosa (strain ATCC 15692 / DSM 22644 / CIP 104116 / JCM 14847 / LMG 12228 / 1C / PRS 101 / PAO1) GN=tal PE=3 SV=1	33.946	15.583	1148000	0	0	0	2	11.4	239300	0	0	0	3	12.7	650930
Q9I062	tr|Q9I062|Q9I062_PSEAE Uncharacterized protein OS=Pseudomonas aeruginosa (strain ATCC 15692 / DSM 22644 / CIP 104116 / JCM 14847 / LMG 12228 / 1C / PRS 101 / PAO1) GN=PA2781 PE=4 SV=1	12.885	-2	4463500	0	0	0	1	14.2	1044400	1	14.2	2230300	0	0	0
Q9I099	sp|Q9I099|SYT_PSEAE Threonine--tRNA ligase OS=Pseudomonas aeruginosa (strain ATCC 15692 / DSM 22644 / CIP 104116 / JCM 14847 / LMG 12228 / 1C / PRS 101 / PAO1) GN=thrS PE=3 SV=1	73.079	10.095	549390	0	0	0	2	6.9	203690	0	0	0	2	6.9	345700
Q9I0A0	sp|Q9I0A0|IF3_PSEAE Translation initiation factor IF-3 OS=Pseudomonas aeruginosa (strain ATCC 15692 / DSM 22644 / CIP 104116 / JCM 14847 / LMG 12228 / 1C / PRS 101 / PAO1) GN=infC PE=3 SV=1	20.882	1.0186	326660	0	0	0	1	7.1	58301	1	7.1	32028	1	7.1	180560
Q9I0B4	tr|Q9I0B4|Q9I0B4_PSEAE Uncharacterized protein OS=Pseudomonas aeruginosa (strain ATCC 15692 / DSM 22644 / CIP 104116 / JCM 14847 / LMG 12228 / 1C / PRS 101 / PAO1) GN=PA2728 PE=4 SV=1	100.27	1.5338	7072.2	0	0	0	0	0	0	0	0	0	1	2	7072.2
Q9I0F9	tr|Q9I0F9|Q9I0F9_PSEAE Uncharacterized protein OS=Pseudomonas aeruginosa (strain ATCC 15692 / DSM 22644 / CIP 104116 / JCM 14847 / LMG 12228 / 1C / PRS 101 / PAO1) GN=PA2679 PE=4 SV=1	27.641	3.0326	682110	0	0	0	1	5.2	21962	0	0	0	2	17.2	568190
Q9I0J1	sp|Q9I0J1|NUOL_PSEAE NADH-quinone oxidoreductase subunit L OS=Pseudomonas aeruginosa (strain ATCC 15692 / DSM 22644 / CIP 104116 / JCM 14847 / LMG 12228 / 1C / PRS 101 / PAO1) GN=nuoL PE=3 SV=1	66.227	1.7633	1273500	0	0	0	2	3.7	341520	1	1.6	58049	2	3.7	709510
Q9I0J5	sp|Q9I0J5|NUOH_PSEAE NADH-quinone oxidoreductase subunit H OS=Pseudomonas aeruginosa (strain ATCC 15692 / DSM 22644 / CIP 104116 / JCM 14847 / LMG 12228 / 1C / PRS 101 / PAO1) GN=nuoH PE=3 SV=1	36.743	6.9845	4725000	0	0	0	1	4.5	2016900	0	0	0	1	4.5	2114800
Q9I0J6	sp|Q9I0J6|NUOG_PSEAE NADH-quinone oxidoreductase subunit G OS=Pseudomonas aeruginosa (strain ATCC 15692 / DSM 22644 / CIP 104116 / JCM 14847 / LMG 12228 / 1C / PRS 101 / PAO1) GN=nuoG PE=3 SV=1	98.999	91.577	16109000	5	8.2	30451	16	33.4	5925700	10	20.6	390080	16	32.9	7471200
Q9I0J7	sp|Q9I0J7|NUOF_PSEAE NADH-quinone oxidoreductase subunit F OS=Pseudomonas aeruginosa (strain ATCC 15692 / DSM 22644 / CIP 104116 / JCM 14847 / LMG 12228 / 1C / PRS 101 / PAO1) GN=nuoF PE=3 SV=1	48.678	81.032	3200500	0	0	0	3	15.6	1185100	1	4.9	34185	3	15.6	1597000
Q9I0J9	sp|Q9I0J9|NUOCD_PSEAE NADH-quinone oxidoreductase subunit C/D OS=Pseudomonas aeruginosa (strain ATCC 15692 / DSM 22644 / CIP 104116 / JCM 14847 / LMG 12228 / 1C / PRS 101 / PAO1) GN=nuoC PE=3 SV=1	68.322	52.316	27248000	0	0	0	10	21.4	3545600	4	10.1	3132500	11	22.8	6507500
Q9I0K0	sp|Q9I0K0|NUOB_PSEAE NADH-quinone oxidoreductase subunit B OS=Pseudomonas aeruginosa (strain ATCC 15692 / DSM 22644 / CIP 104116 / JCM 14847 / LMG 12228 / 1C / PRS 101 / PAO1) GN=nuoB PE=3 SV=1	25.425	12.726	3782200	0	0	0	4	31.6	1388700	0	0	0	4	31.6	2393500
Q9I0K4	sp|Q9I0K4|ACEA_PSEAE Isocitrate lyase OS=Pseudomonas aeruginosa (strain ATCC 15692 / DSM 22644 / CIP 104116 / JCM 14847 / LMG 12228 / 1C / PRS 101 / PAO1) GN=PA2634 PE=1 SV=1	58.886	74.043	17774000	2	5.5	28387	11	36.2	6025000	8	24.9	799600	11	36.2	9529600
Q9I0K9	sp|Q9I0K9|PUR8_PSEAE Adenylosuccinate lyase OS=Pseudomonas aeruginosa (strain ATCC 15692 / DSM 22644 / CIP 104116 / JCM 14847 / LMG 12228 / 1C / PRS 101 / PAO1) GN=purB PE=3 SV=1	50.5	1.5344	1375600	0	0	0	2	11	480730	1	7.7	30949	2	11	863910
Q9I0L4	tr|Q9I0L4|Q9I0L4_PSEAE Isocitrate dehydrogenase OS=Pseudomonas aeruginosa (strain ATCC 15692 / DSM 22644 / CIP 104116 / JCM 14847 / LMG 12228 / 1C / PRS 101 / PAO1) GN=idh PE=4 SV=1	81.633	136.71	23025000	4	8.6	22127	18	40.6	6413800	12	23.8	614870	19	40.6	12435000
Q9I0L5	tr|Q9I0L5|Q9I0L5_PSEAE Isocitrate dehydrogenase [NADP] OS=Pseudomonas aeruginosa (strain ATCC 15692 / DSM 22644 / CIP 104116 / JCM 14847 / LMG 12228 / 1C / PRS 101 / PAO1) GN=icd PE=3 SV=1	45.577	110.52	59058000	8	22.7	105050	18	54.5	18981000	13	42.8	2638100	18	56.7	26292000
Q9I0L8	tr|Q9I0L8|Q9I0L8_PSEAE ATP-binding protease component ClpA OS=Pseudomonas aeruginosa (strain ATCC 15692 / DSM 22644 / CIP 104116 / JCM 14847 / LMG 12228 / 1C / PRS 101 / PAO1) GN=clpA PE=3 SV=1	84.01	5.8277	7612300	0	0	0	1	3.7	55179	1	3.7	18099	1	3.7	72028
Q9I0M6	sp|Q9I0M6|SYS_PSEAE Serine--tRNA ligase OS=Pseudomonas aeruginosa (strain ATCC 15692 / DSM 22644 / CIP 104116 / JCM 14847 / LMG 12228 / 1C / PRS 101 / PAO1) GN=serS PE=3 SV=1	47.231	2.7604	26339	0	0	0	1	3.3	11421	0	0	0	1	3.3	14918
Q9I0Q0	sp|Q9I0Q0|PQSH_PSEAE 2-heptyl-3-hydroxy-4(1H)-quinolone synthase OS=Pseudomonas aeruginosa (strain ATCC 15692 / DSM 22644 / CIP 104116 / JCM 14847 / LMG 12228 / 1C / PRS 101 / PAO1) GN=pqsH PE=3 SV=1	42.081	1.206	691880	0	0	0	1	7.6	245610	0	0	0	1	7.6	231770
Q9I0R1	tr|Q9I0R1|Q9I0R1_PSEAE Uncharacterized protein OS=Pseudomonas aeruginosa (strain ATCC 15692 / DSM 22644 / CIP 104116 / JCM 14847 / LMG 12228 / 1C / PRS 101 / PAO1) GN=PA2575 PE=4 SV=1	22.222	5.4105	2577100	1	10.5	23280	2	13.5	653240	1	9	85937	2	13.5	1573300
Q9I0R4	tr|Q9I0R4|Q9I0R4_PSEAE Probable two-component response regulator OS=Pseudomonas aeruginosa (strain ATCC 15692 / DSM 22644 / CIP 104116 / JCM 14847 / LMG 12228 / 1C / PRS 101 / PAO1) GN=PA2572 PE=4 SV=1	50.757	2.5329	419030	0	0	0	1	7.2	217210	0	0	0	1	7.2	201820
Q9I0T0	tr|Q9I0T0|Q9I0T0_PSEAE Probable short-chain dehydrogenase OS=Pseudomonas aeruginosa (strain ATCC 15692 / DSM 22644 / CIP 104116 / JCM 14847 / LMG 12228 / 1C / PRS 101 / PAO1) GN=PA2554 PE=3 SV=1	26.426	4.2082	83436	0	0	0	1	6.7	15324	0	0	0	1	6.7	68112
Q9I0T1	tr|Q9I0T1|Q9I0T1_PSEAE Probable acyl-CoA thiolase OS=Pseudomonas aeruginosa (strain ATCC 15692 / DSM 22644 / CIP 104116 / JCM 14847 / LMG 12228 / 1C / PRS 101 / PAO1) GN=PA2553 PE=3 SV=1	41.4	36.043	6711300	0	0	0	5	22.2	1934300	2	7.3	153810	6	24.7	3030300
Q9I0T2	tr|Q9I0T2|Q9I0T2_PSEAE Probable acyl-CoA dehydrogenase OS=Pseudomonas aeruginosa (strain ATCC 15692 / DSM 22644 / CIP 104116 / JCM 14847 / LMG 12228 / 1C / PRS 101 / PAO1) GN=PA2552 PE=3 SV=1	40.908	10.653	162130	0	0	0	1	3.5	22160	0	0	0	1	3.5	139960
Q9I0W5	tr|Q9I0W5|Q9I0W5_PSEAE Toluate 1,2-dioxygenase beta subunit OS=Pseudomonas aeruginosa (strain ATCC 15692 / DSM 22644 / CIP 104116 / JCM 14847 / LMG 12228 / 1C / PRS 101 / PAO1) GN=xylY PE=4 SV=1	19.191	-2	237100	0	0	0	0	0	0	0	0	0	0	0	0
Q9I137	sp|Q9I137|GCSP1_PSEAE Glycine dehydrogenase (decarboxylating) 1 OS=Pseudomonas aeruginosa (strain ATCC 15692 / DSM 22644 / CIP 104116 / JCM 14847 / LMG 12228 / 1C / PRS 101 / PAO1) GN=gcvP1 PE=3 SV=1	103.92	8.2393	722380	1	1.1	2661.2	3	6.2	211340	1	1.1	23770	3	6.2	327210
Q9I140	tr|Q9I140|Q9I140_PSEAE Aminomethyltransferase OS=Pseudomonas aeruginosa (strain ATCC 15692 / DSM 22644 / CIP 104116 / JCM 14847 / LMG 12228 / 1C / PRS 101 / PAO1) GN=gcvT2 PE=3 SV=1	39.882	11.09	169300	0	0	0	1	3.2	13004	0	0	0	1	3.2	28196
Q9I1E7	tr|Q9I1E7|Q9I1E7_PSEAE Alkyl hydroperoxide reductase AhpD OS=Pseudomonas aeruginosa (strain ATCC 15692 / DSM 22644 / CIP 104116 / JCM 14847 / LMG 12228 / 1C / PRS 101 / PAO1) GN=PA2331 PE=3 SV=1	19.904	14.734	6391600	0	0	0	3	27.4	508760	2	11.8	149350	2	11.3	2732800
Q9I1F7	tr|Q9I1F7|Q9I1F7_PSEAE Uncharacterized protein OS=Pseudomonas aeruginosa (strain ATCC 15692 / DSM 22644 / CIP 104116 / JCM 14847 / LMG 12228 / 1C / PRS 101 / PAO1) GN=PA2318 PE=4 SV=1	12.889	12.906	1182300	0	0	0	1	10.7	57546	2	28.1	397080	2	28.1	522460
Q9I1H0	tr|Q9I1H0|Q9I1H0_PSEAE AmbB OS=Pseudomonas aeruginosa (strain ATCC 15692 / DSM 22644 / CIP 104116 / JCM 14847 / LMG 12228 / 1C / PRS 101 / PAO1) GN=ambB PE=3 SV=1	134.45	6.4251	18743	0	0	0	1	2.8	18743	0	0	0	0	0	0
Q9I1H3	tr|Q9I1H3|Q9I1H3_PSEAE AmbE OS=Pseudomonas aeruginosa (strain ATCC 15692 / DSM 22644 / CIP 104116 / JCM 14847 / LMG 12228 / 1C / PRS 101 / PAO1) GN=ambE PE=4 SV=1	229.04	2.2507	163240	2	1.6	15690	2	1.3	84623	0	0	0	2	1.3	62923
Q9I1H5	tr|Q9I1H5|Q9I1H5_PSEAE Chitinase OS=Pseudomonas aeruginosa (strain ATCC 15692 / DSM 22644 / CIP 104116 / JCM 14847 / LMG 12228 / 1C / PRS 101 / PAO1) GN=chiC PE=3 SV=1	53.042	8.5104	2327600	0	0	0	2	6.8	225090	1	1.9	76323	2	6.6	472700
Q9I1L9	sp|Q9I1L9|DLDH1_PSEAE Dihydrolipoyl dehydrogenase OS=Pseudomonas aeruginosa (strain ATCC 15692 / DSM 22644 / CIP 104116 / JCM 14847 / LMG 12228 / 1C / PRS 101 / PAO1) GN=lpdV PE=1 SV=1	48.588	3.9001	1665300	0	0	0	2	6.7	314580	1	3.4	74451	2	6.7	754510
Q9I1M0	sp|Q9I1M0|ODB2_PSEAE Lipoamide acyltransferase component of branched-chain alpha-keto acid dehydrogenase complex OS=Pseudomonas aeruginosa (strain ATCC 15692 / DSM 22644 / CIP 104116 / JCM 14847 / LMG 12228 / 1C / PRS 101 / PAO1) GN=bkdB PE=1 SV=1	45.774	23.479	2382700	0	0	0	3	14	650930	2	9.3	70040	3	14	989010
Q9I1M1	sp|Q9I1M1|ODBB_PSEAE 2-oxoisovalerate dehydrogenase subunit beta OS=Pseudomonas aeruginosa (strain ATCC 15692 / DSM 22644 / CIP 104116 / JCM 14847 / LMG 12228 / 1C / PRS 101 / PAO1) GN=bkdA2 PE=3 SV=1	38.324	3.2515	970400	0	0	0	1	11.1	314610	1	4.3	61811	2	15.4	593980
Q9I1M2	sp|Q9I1M2|ODBA_PSEAE 2-oxoisovalerate dehydrogenase subunit alpha OS=Pseudomonas aeruginosa (strain ATCC 15692 / DSM 22644 / CIP 104116 / JCM 14847 / LMG 12228 / 1C / PRS 101 / PAO1) GN=bkdA1 PE=3 SV=1	45.256	5.9532	1972400	1	6.8	21142	3	15.6	769150	0	0	0	3	15.6	1182200
Q9I1N2	tr|Q9I1N2|Q9I1N2_PSEAE PslG OS=Pseudomonas aeruginosa (strain ATCC 15692 / DSM 22644 / CIP 104116 / JCM 14847 / LMG 12228 / 1C / PRS 101 / PAO1) GN=pslG PE=1 SV=1	50.071	6.6139	278870	0	0	0	1	2.7	278870	0	0	0	0	0	0
Q9I1N7	tr|Q9I1N7|Q9I1N7_PSEAE PslB OS=Pseudomonas aeruginosa (strain ATCC 15692 / DSM 22644 / CIP 104116 / JCM 14847 / LMG 12228 / 1C / PRS 101 / PAO1) GN=pslB PE=3 SV=1	53.515	20.752	14889	0	0	0	1	3.1	14889	0	0	0	1	3.1	0
Q9I1S2	sp|Q9I1S2|HCNB_PSEAE Hydrogen cyanide synthase subunit HcnB OS=Pseudomonas aeruginosa (strain ATCC 15692 / DSM 22644 / CIP 104116 / JCM 14847 / LMG 12228 / 1C / PRS 101 / PAO1) GN=hcnB PE=1 SV=1	50.388	3.5031	1185600	0	0	0	2	7.8	319470	0	0	0	3	10.1	866110
Q9I1Z6	tr|Q9I1Z6|Q9I1Z6_PSEAE Alcohol dehydrogenase (Zn-dependent) OS=Pseudomonas aeruginosa (strain ATCC 15692 / DSM 22644 / CIP 104116 / JCM 14847 / LMG 12228 / 1C / PRS 101 / PAO1) GN=PA2119 PE=3 SV=1	38.561	2.8304	1196300	0	0	0	1	4.1	258420	1	5.2	59759	2	9.3	878080
Q9I246	tr|Q9I246|Q9I246_PSEAE Probable carbamoyl transferase OS=Pseudomonas aeruginosa (strain ATCC 15692 / DSM 22644 / CIP 104116 / JCM 14847 / LMG 12228 / 1C / PRS 101 / PAO1) GN=PA2069 PE=4 SV=1	63.382	42.17	4021000	0	0	0	6	18.1	305700	0	0	0	7	19.5	908060
Q9I291	sp|Q9I291|GALU_PSEAE UTP--glucose-1-phosphate uridylyltransferase OS=Pseudomonas aeruginosa (strain ATCC 15692 / DSM 22644 / CIP 104116 / JCM 14847 / LMG 12228 / 1C / PRS 101 / PAO1) GN=galU PE=3 SV=1	31.236	5.2014	4146500	0	0	0	2	22.2	1807500	1	11.5	82542	2	22.2	2256400
Q9I296	tr|Q9I296|Q9I296_PSEAE Putative isovaleryl-CoA dehydrogenase OS=Pseudomonas aeruginosa (strain ATCC 15692 / DSM 22644 / CIP 104116 / JCM 14847 / LMG 12228 / 1C / PRS 101 / PAO1) GN=liuA PE=3 SV=1	42.209	1.4887	676380	1	3.1	3936.6	1	3.9	195220	0	0	0	1	3.9	446040
Q9I297	tr|Q9I297|Q9I297_PSEAE Methylcrotonyl-CoA carboxylase, beta-subunit OS=Pseudomonas aeruginosa (strain ATCC 15692 / DSM 22644 / CIP 104116 / JCM 14847 / LMG 12228 / 1C / PRS 101 / PAO1) GN=liuB PE=1 SV=1	57.433	7.9829	676680	0	0	0	2	9.9	187960	1	6.5	59308	2	9.9	429410
Q9I299	tr|Q9I299|Q9I299_PSEAE Methylcrotonyl-CoA carboxylase, alpha-subunit (Biotin-containing) OS=Pseudomonas aeruginosa (strain ATCC 15692 / DSM 22644 / CIP 104116 / JCM 14847 / LMG 12228 / 1C / PRS 101 / PAO1) GN=liuD PE=1 SV=1	71.282	261.34	254940000	17	47.6	447600	24	63.2	44394000	24	61.2	10905000	26	63.2	85825000
Q9I2A8	sp|Q9I2A8|ATOB_PSEAE Acetyl-CoA acetyltransferase OS=Pseudomonas aeruginosa (strain ATCC 15692 / DSM 22644 / CIP 104116 / JCM 14847 / LMG 12228 / 1C / PRS 101 / PAO1) GN=atoB PE=3 SV=1	40.405	5.3808	749420	0	0	0	0	0	0	0	0	0	1	3.3	201430
Q9I2A9	tr|Q9I2A9|Q9I2A9_PSEAE DhcB, dehydrocarnitine CoA transferase, subunit B OS=Pseudomonas aeruginosa (strain ATCC 15692 / DSM 22644 / CIP 104116 / JCM 14847 / LMG 12228 / 1C / PRS 101 / PAO1) GN=dhcB PE=4 SV=1	23.187	2.487	1315700	0	0	0	1	11	309900	0	0	0	1	11	862510
Q9I2L1	tr|Q9I2L1|Q9I2L1_PSEAE DNA polymerase OS=Pseudomonas aeruginosa (strain ATCC 15692 / DSM 22644 / CIP 104116 / JCM 14847 / LMG 12228 / 1C / PRS 101 / PAO1) GN=polB PE=3 SV=1	89.722	-2	1692200	0	0	0	1	2	183340	1	2	275330	1	2	542640
Q9I2R2	tr|Q9I2R2|Q9I2R2_PSEAE Probable oxidoreductase OS=Pseudomonas aeruginosa (strain ATCC 15692 / DSM 22644 / CIP 104116 / JCM 14847 / LMG 12228 / 1C / PRS 101 / PAO1) GN=PA1833 PE=4 SV=1	34.551	6.0175	3175300	0	0	0	2	9.4	563740	1	3.9	58840	3	12.1	1471100
Q9I2T9	tr|Q9I2T9|Q9I2T9_PSEAE Lon protease OS=Pseudomonas aeruginosa (strain ATCC 15692 / DSM 22644 / CIP 104116 / JCM 14847 / LMG 12228 / 1C / PRS 101 / PAO1) GN=lon PE=2 SV=1	88.646	1.327	129280	0	0	0	1	1.8	24155	0	0	0	1	1.8	105120
Q9I2U0	sp|Q9I2U0|CLPX_PSEAE ATP-dependent Clp protease ATP-binding subunit ClpX OS=Pseudomonas aeruginosa (strain ATCC 15692 / DSM 22644 / CIP 104116 / JCM 14847 / LMG 12228 / 1C / PRS 101 / PAO1) GN=clpX PE=3 SV=1	46.991	19.629	1938300	1	3.5	6862	2	8.5	503450	1	5.4	307560	3	10.6	1050900
Q9I2U2	sp|Q9I2U2|TIG_PSEAE Trigger factor OS=Pseudomonas aeruginosa (strain ATCC 15692 / DSM 22644 / CIP 104116 / JCM 14847 / LMG 12228 / 1C / PRS 101 / PAO1) GN=tig PE=3 SV=1	48.581	59.2	8592300	3	9.2	28923	13	43.6	3190300	7	24.3	795610	12	40.8	3372900
Q9I2U7	sp|Q9I2U7|SYC_PSEAE Cysteine--tRNA ligase OS=Pseudomonas aeruginosa (strain ATCC 15692 / DSM 22644 / CIP 104116 / JCM 14847 / LMG 12228 / 1C / PRS 101 / PAO1) GN=cysS PE=3 SV=1	51.276	1.1887	98155	0	0	0	0	0	0	0	0	0	1	2.2	98155
Q9I2U8	sp|Q9I2U8|SYQ_PSEAE Glutamine--tRNA ligase OS=Pseudomonas aeruginosa (strain ATCC 15692 / DSM 22644 / CIP 104116 / JCM 14847 / LMG 12228 / 1C / PRS 101 / PAO1) GN=glnS PE=1 SV=1	62.912	10.296	344270	1	2.7	11799	2	5	19223	0	0	0	3	6.8	313240
Q9I2V3	tr|Q9I2V3|Q9I2V3_PSEAE Uncharacterized protein OS=Pseudomonas aeruginosa (strain ATCC 15692 / DSM 22644 / CIP 104116 / JCM 14847 / LMG 12228 / 1C / PRS 101 / PAO1) GN=PA1789 PE=1 SV=1	31.273	6.9466	1487000	1	4.5	14526	2	9.1	276690	0	0	0	2	9.8	1123500
Q9I2V5	sp|Q9I2V5|ACNB_PSEAE Aconitate hydratase B OS=Pseudomonas aeruginosa (strain ATCC 15692 / DSM 22644 / CIP 104116 / JCM 14847 / LMG 12228 / 1C / PRS 101 / PAO1) GN=acnB PE=3 SV=1	93.627	172.55	39224000	4	8.3	103340	34	57	10116000	23	42.2	1531200	34	58.9	21682000
Q9I2W9	tr|Q9I2W9|Q9I2W9_PSEAE Phosphoenolpyruvate synthase OS=Pseudomonas aeruginosa (strain ATCC 15692 / DSM 22644 / CIP 104116 / JCM 14847 / LMG 12228 / 1C / PRS 101 / PAO1) GN=ppsA PE=3 SV=1	85.816	53.419	7294900	1	2.3	3477	9	16.3	1707300	4	7.2	234910	13	21.2	3679300
Q9I2X1	tr|Q9I2X1|Q9I2X1_PSEAE Uncharacterized protein OS=Pseudomonas aeruginosa (strain ATCC 15692 / DSM 22644 / CIP 104116 / JCM 14847 / LMG 12228 / 1C / PRS 101 / PAO1) GN=PA1768 PE=4 SV=1	19.72	1.334	155740	0	0	0	0	0	0	1	10.6	155740	0	0	0
Q9I2Y7	tr|Q9I2Y7|Q9I2Y7_PSEAE Phospho-2-dehydro-3-deoxyheptonate aldolase OS=Pseudomonas aeruginosa (strain ATCC 15692 / DSM 22644 / CIP 104116 / JCM 14847 / LMG 12228 / 1C / PRS 101 / PAO1) GN=PA1750 PE=3 SV=1	39.132	2.3686	523200	0	0	0	1	8.1	199370	0	0	0	1	8.1	323830
Q9I2Z1	tr|Q9I2Z1|Q9I2Z1_PSEAE Uncharacterized protein OS=Pseudomonas aeruginosa (strain ATCC 15692 / DSM 22644 / CIP 104116 / JCM 14847 / LMG 12228 / 1C / PRS 101 / PAO1) GN=PA1746 PE=4 SV=1	18.189	25.631	43057000	2	30.4	248400	6	74.4	13900000	0	0	0	7	75	27894000
Q9I2Z5	tr|Q9I2Z5|Q9I2Z5_PSEAE Probable amidotransferase OS=Pseudomonas aeruginosa (strain ATCC 15692 / DSM 22644 / CIP 104116 / JCM 14847 / LMG 12228 / 1C / PRS 101 / PAO1) GN=PA1742 PE=4 SV=1	27.361	0.99105	3510600	0	0	0	2	16.2	1564900	0	0	0	2	16.2	1945700
Q9I324	tr|Q9I324|Q9I324_PSEAE Translocator protein PopB OS=Pseudomonas aeruginosa (strain ATCC 15692 / DSM 22644 / CIP 104116 / JCM 14847 / LMG 12228 / 1C / PRS 101 / PAO1) GN=popB PE=4 SV=1	40.061	1.291	2751200	0	0	0	1	2.8	256910	1	2.8	261180	1	2.8	978400
Q9I373	tr|Q9I373|Q9I373_PSEAE Uncharacterized protein OS=Pseudomonas aeruginosa (strain ATCC 15692 / DSM 22644 / CIP 104116 / JCM 14847 / LMG 12228 / 1C / PRS 101 / PAO1) GN=PA1652 PE=4 SV=1	23.276	1.3952	63998	0	0	0	1	4.7	63998	0	0	0	0	0	0
Q9I383	sp|Q9I383|SELD_PSEAE Selenide, water dikinase OS=Pseudomonas aeruginosa (strain ATCC 15692 / DSM 22644 / CIP 104116 / JCM 14847 / LMG 12228 / 1C / PRS 101 / PAO1) GN=selD PE=3 SV=1	36.353	9.4465	1205200	0	0	0	2	16.9	824520	0	0	0	2	16.9	380660
Q9I3B2	tr|Q9I3B2|Q9I3B2_PSEAE Beta-ketoacyl-ACP synthase I OS=Pseudomonas aeruginosa (strain ATCC 15692 / DSM 22644 / CIP 104116 / JCM 14847 / LMG 12228 / 1C / PRS 101 / PAO1) GN=fabB PE=3 SV=1	42.806	31.143	10109000	0	0	0	4	18.3	2005400	2	8.4	269600	5	24	6319800
Q9I3C5	sp|Q9I3C5|HTPG_PSEAE Chaperone protein HtpG OS=Pseudomonas aeruginosa (strain ATCC 15692 / DSM 22644 / CIP 104116 / JCM 14847 / LMG 12228 / 1C / PRS 101 / PAO1) GN=htpG PE=3 SV=1	71.667	35.921	7133600	3	7.4	8307.1	9	21.1	2071000	8	18.3	509430	11	24.6	3780400
Q9I3D1	sp|Q9I3D1|DLDH2_PSEAE Dihydrolipoyl dehydrogenase OS=Pseudomonas aeruginosa (strain ATCC 15692 / DSM 22644 / CIP 104116 / JCM 14847 / LMG 12228 / 1C / PRS 101 / PAO1) GN=lpdG PE=3 SV=1	50.164	110.73	39992000	3	11.7	180000	14	43.3	11464000	12	37.4	1684700	14	43.3	19287000
Q9I3D2	sp|Q9I3D2|ODO2_PSEAE Dihydrolipoyllysine-residue succinyltransferase component of 2-oxoglutarate dehydrogenase complex OS=Pseudomonas aeruginosa (strain ATCC 15692 / DSM 22644 / CIP 104116 / JCM 14847 / LMG 12228 / 1C / PRS 101 / PAO1) GN=sucB PE=3 SV=1	42.887	38.962	23744000	2	11.7	38450	9	43.8	6499400	10	42.1	3668800	9	43.8	9939900
Q9I3D3	tr|Q9I3D3|Q9I3D3_PSEAE 2-oxoglutarate dehydrogenase (E1 subunit) OS=Pseudomonas aeruginosa (strain ATCC 15692 / DSM 22644 / CIP 104116 / JCM 14847 / LMG 12228 / 1C / PRS 101 / PAO1) GN=sucA PE=4 SV=1	105.88	85.039	21779000	5	10.1	37656	15	31.1	5991300	8	16	1868100	16	31.9	8294900
Q9I3D4	tr|Q9I3D4|Q9I3D4_PSEAE Succinate dehydrogenase (B subunit) OS=Pseudomonas aeruginosa (strain ATCC 15692 / DSM 22644 / CIP 104116 / JCM 14847 / LMG 12228 / 1C / PRS 101 / PAO1) GN=sdhB PE=4 SV=1	26.155	30.648	18586000	2	9.8	41465	7	36.6	5663300	6	30.6	907770	7	36.6	10156000
Q9I3D5	tr|Q9I3D5|Q9I3D5_PSEAE Succinate dehydrogenase flavoprotein subunit OS=Pseudomonas aeruginosa (strain ATCC 15692 / DSM 22644 / CIP 104116 / JCM 14847 / LMG 12228 / 1C / PRS 101 / PAO1) GN=sdhA PE=3 SV=1	63.531	156.68	42680000	3	10.3	53390	15	42.2	14208000	10	28.6	1272000	15	42.2	22331000
Q9I3E3	sp|Q9I3E3|Y1574_PSEAE UPF0345 protein PA1574 OS=Pseudomonas aeruginosa (strain ATCC 15692 / DSM 22644 / CIP 104116 / JCM 14847 / LMG 12228 / 1C / PRS 101 / PAO1) GN=PA1574 PE=3 SV=1	10.156	3.9788	12973000	0	0	0	2	23.7	2090200	1	12.9	186050	2	23.7	7402600
Q9I3F5	sp|Q9I3F5|ACNA_PSEAE Aconitate hydratase A OS=Pseudomonas aeruginosa (strain ATCC 15692 / DSM 22644 / CIP 104116 / JCM 14847 / LMG 12228 / 1C / PRS 101 / PAO1) GN=acnA PE=3 SV=1	99.147	87.855	16939000	2	5.2	4649.6	16	32.4	4731300	10	21.1	709460	18	33.6	8224600
Q9I3G0	tr|Q9I3G0|Q9I3G0_PSEAE Cytochrome c oxidase, cbb3-type, CcoN subunit OS=Pseudomonas aeruginosa (strain ATCC 15692 / DSM 22644 / CIP 104116 / JCM 14847 / LMG 12228 / 1C / PRS 101 / PAO1) GN=ccoN2 PE=3 SV=1	53.09	3.4746	16470000	0	0	0	3	11.6	3965700	2	6.1	268390	3	11.6	9024100
Q9I3G1	tr|Q9I3G1|Q9I3G1_PSEAE Cytochrome c oxidase, cbb3-type, CcoO subunit OS=Pseudomonas aeruginosa (strain ATCC 15692 / DSM 22644 / CIP 104116 / JCM 14847 / LMG 12228 / 1C / PRS 101 / PAO1) GN=ccoO2 PE=4 SV=1	22.778	34.674	20075000	0	0	0	4	21.3	6192800	3	20.3	1063200	4	21.3	9435200
Q9I3G2	tr|Q9I3G2|Q9I3G2_PSEAE Cbb3-type cytochrome c oxidase subunit OS=Pseudomonas aeruginosa (strain ATCC 15692 / DSM 22644 / CIP 104116 / JCM 14847 / LMG 12228 / 1C / PRS 101 / PAO1) GN=ccoP2 PE=3 SV=1	33.812	28.031	16810000	0	0	0	7	36	6333500	1	4.5	65428	7	36	8279300
Q9I3G3	tr|Q9I3G3|Q9I3G3_PSEAE Cytochrome c oxidase, cbb3-type, CcoN subunit OS=Pseudomonas aeruginosa (strain ATCC 15692 / DSM 22644 / CIP 104116 / JCM 14847 / LMG 12228 / 1C / PRS 101 / PAO1) GN=ccoN1 PE=3 SV=1	53.108	7.2202	10543000	0	0	0	2	8	4397000	1	5.5	395980	2	8	5265000
Q9I3G4	tr|Q9I3G4|Q9I3G4_PSEAE Cytochrome c oxidase, cbb3-type, CcoO subunit OS=Pseudomonas aeruginosa (strain ATCC 15692 / DSM 22644 / CIP 104116 / JCM 14847 / LMG 12228 / 1C / PRS 101 / PAO1) GN=ccoO1 PE=4 SV=1	22.758	18.892	820700	0	0	0	2	14.3	396540	2	14.3	118080	2	14.3	206200
Q9I3G5	tr|Q9I3G5|Q9I3G5_PSEAE Cbb3-type cytochrome c oxidase subunit OS=Pseudomonas aeruginosa (strain ATCC 15692 / DSM 22644 / CIP 104116 / JCM 14847 / LMG 12228 / 1C / PRS 101 / PAO1) GN=ccoP1 PE=3 SV=1	34.644	0.92369	730140	0	0	0	1	4.1	386010	0	0	0	1	4.1	344130
Q9I3G6	tr|Q9I3G6|Q9I3G6_PSEAE Probable ferredoxin OS=Pseudomonas aeruginosa (strain ATCC 15692 / DSM 22644 / CIP 104116 / JCM 14847 / LMG 12228 / 1C / PRS 101 / PAO1) GN=PA1551 PE=4 SV=1	53.62	6.6118	6564200	0	0	0	5	20.6	1625400	2	10.8	131860	5	20.6	4308900
Q9I3I0	sp|Q9I3I0|Y1533_PSEAE Nucleoid-associated protein PA1533 OS=Pseudomonas aeruginosa (strain ATCC 15692 / DSM 22644 / CIP 104116 / JCM 14847 / LMG 12228 / 1C / PRS 101 / PAO1) GN=PA1533 PE=3 SV=1	11.877	1.7989	5172000	1	17.6	110350	2	43.5	859850	2	43.5	1082000	2	43.5	1583800
Q9I3Q9	tr|Q9I3Q9|Q9I3Q9_PSEAE Probable two-component sensor OS=Pseudomonas aeruginosa (strain ATCC 15692 / DSM 22644 / CIP 104116 / JCM 14847 / LMG 12228 / 1C / PRS 101 / PAO1) GN=PA1438 PE=4 SV=1	53.725	-2	186700	0	0	0	1	3.3	33779	0	0	0	1	3.3	53954
Q9I3X2	tr|Q9I3X2|Q9I3X2_PSEAE Uncharacterized protein OS=Pseudomonas aeruginosa (strain ATCC 15692 / DSM 22644 / CIP 104116 / JCM 14847 / LMG 12228 / 1C / PRS 101 / PAO1) GN=PA1372 PE=4 SV=1	79.82	2.267	621190	0	0	0	1	2.3	84583	0	0	0	3	5.3	345730
Q9I3Z5	tr|Q9I3Z5|Q9I3Z5_PSEAE Uncharacterized protein OS=Pseudomonas aeruginosa (strain ATCC 15692 / DSM 22644 / CIP 104116 / JCM 14847 / LMG 12228 / 1C / PRS 101 / PAO1) GN=PA1349 PE=1 SV=1	12.753	4.4131	613860	0	0	0	0	0	0	0	0	0	0	0	0
Q9I402	tr|Q9I402|Q9I402_PSEAE Probable binding protein component of ABC transporter OS=Pseudomonas aeruginosa (strain ATCC 15692 / DSM 22644 / CIP 104116 / JCM 14847 / LMG 12228 / 1C / PRS 101 / PAO1) GN=PA1342 PE=4 SV=1	33.054	4.3319	258160	0	0	0	1	4.3	142160	1	4.3	67623	1	4.3	0
Q9I407	sp|Q9I407|ASPQ_PSEAE Glutaminase-asparaginase OS=Pseudomonas aeruginosa (strain ATCC 15692 / DSM 22644 / CIP 104116 / JCM 14847 / LMG 12228 / 1C / PRS 101 / PAO1) GN=ansB PE=1 SV=1	38.644	4.4504	1147200	1	8.3	11599	2	12.2	652660	0	0	0	1	3.9	451530
Q9I4I1	tr|Q9I4I1|Q9I4I1_PSEAE Ribonucleoside-diphosphate reductase OS=Pseudomonas aeruginosa (strain ATCC 15692 / DSM 22644 / CIP 104116 / JCM 14847 / LMG 12228 / 1C / PRS 101 / PAO1) GN=nrdA PE=1 SV=1	107.11	72.508	7400900	4	5.7	7409	15	27.4	2655100	4	8.4	103910	16	29.3	4116100
Q9I4I2	tr|Q9I4I2|Q9I4I2_PSEAE Ribonucleoside-diphosphate reductase subunit beta OS=Pseudomonas aeruginosa (strain ATCC 15692 / DSM 22644 / CIP 104116 / JCM 14847 / LMG 12228 / 1C / PRS 101 / PAO1) GN=nrdB PE=3 SV=1	47.386	29.271	6308800	1	5.3	54673	6	27.5	1745100	1	5.3	34110	6	27.5	3916500
Q9I4Q3	tr|Q9I4Q3|Q9I4Q3_PSEAE Uncharacterized protein OS=Pseudomonas aeruginosa (strain ATCC 15692 / DSM 22644 / CIP 104116 / JCM 14847 / LMG 12228 / 1C / PRS 101 / PAO1) GN=PA1076 PE=1 SV=1	13.743	0.99814	1236100	0	0	0	0	0	0	0	0	0	0	0	0
Q9I4Q5	tr|Q9I4Q5|Q9I4Q5_PSEAE Uncharacterized protein OS=Pseudomonas aeruginosa (strain ATCC 15692 / DSM 22644 / CIP 104116 / JCM 14847 / LMG 12228 / 1C / PRS 101 / PAO1) GN=PA1069 PE=4 SV=1	86.114	2.1131	99763	0	0	0	0	0	0	0	0	0	1	2.1	99763
Q9I4S1	tr|Q9I4S1|Q9I4S1_PSEAE Uncharacterized protein OS=Pseudomonas aeruginosa (strain ATCC 15692 / DSM 22644 / CIP 104116 / JCM 14847 / LMG 12228 / 1C / PRS 101 / PAO1) GN=PA1053 PE=4 SV=1	15.649	28.627	1721700	0	0	0	2	25.3	528970	0	0	0	2	25.3	1192700
Q9I4W0	sp|Q9I4W0|PUR7_PSEAE Phosphoribosylaminoimidazole-succinocarboxamide synthase OS=Pseudomonas aeruginosa (strain ATCC 15692 / DSM 22644 / CIP 104116 / JCM 14847 / LMG 12228 / 1C / PRS 101 / PAO1) GN=purC PE=3 SV=1	26.83	2.304	2283200	0	0	0	3	15.7	635560	0	0	0	3	15.7	1369300
Q9I4W3	sp|Q9I4W3|DAPA_PSEAE 4-hydroxy-tetrahydrodipicolinate synthase OS=Pseudomonas aeruginosa (strain ATCC 15692 / DSM 22644 / CIP 104116 / JCM 14847 / LMG 12228 / 1C / PRS 101 / PAO1) GN=dapA PE=1 SV=1	31.449	2.8837	715300	0	0	0	1	4.1	116470	0	0	0	2	8.2	598840
Q9I4X1	tr|Q9I4X1|Q9I4X1_PSEAE PqsC OS=Pseudomonas aeruginosa (strain ATCC 15692 / DSM 22644 / CIP 104116 / JCM 14847 / LMG 12228 / 1C / PRS 101 / PAO1) GN=pqsC PE=1 SV=1	38.238	21.035	13620000	3	12.9	39576	6	33	3792600	0	0	0	8	42.2	8802700
Q9I4X2	tr|Q9I4X2|Q9I4X2_PSEAE PqsB OS=Pseudomonas aeruginosa (strain ATCC 15692 / DSM 22644 / CIP 104116 / JCM 14847 / LMG 12228 / 1C / PRS 101 / PAO1) GN=pqsB PE=1 SV=1	30.5	9.7388	6353900	0	0	0	5	36.7	2442100	1	5.3	96830	5	36.7	3815000
Q9I4Z4	sp|Q9I4Z4|PAL_PSEAE Peptidoglycan-associated lipoprotein OS=Pseudomonas aeruginosa (strain ATCC 15692 / DSM 22644 / CIP 104116 / JCM 14847 / LMG 12228 / 1C / PRS 101 / PAO1) GN=pal PE=3 SV=1	17.925	19.275	5809700	0	0	0	1	11.3	2739000	1	11.3	352680	1	11.3	1803800
Q9I4Z7	tr|Q9I4Z7|Q9I4Z7_PSEAE Probable dna-binding stress protein OS=Pseudomonas aeruginosa (strain ATCC 15692 / DSM 22644 / CIP 104116 / JCM 14847 / LMG 12228 / 1C / PRS 101 / PAO1) GN=PA0962 PE=3 SV=1	17.493	3.7108	770050	0	0	0	1	7.1	147850	1	8.3	120970	1	7.1	249360
Q9I513	sp|Q9I513|PUR5_PSEAE Phosphoribosylformylglycinamidine cyclo-ligase OS=Pseudomonas aeruginosa (strain ATCC 15692 / DSM 22644 / CIP 104116 / JCM 14847 / LMG 12228 / 1C / PRS 101 / PAO1) GN=purM PE=3 SV=1	37.122	1.8704	1599900	0	0	0	1	6.8	517440	1	6.8	84485	2	9.9	997980
Q9I553	sp|Q9I553|SYA_PSEAE Alanine--tRNA ligase OS=Pseudomonas aeruginosa (strain ATCC 15692 / DSM 22644 / CIP 104116 / JCM 14847 / LMG 12228 / 1C / PRS 101 / PAO1) GN=alaS PE=3 SV=1	94.701	17.432	96142	1	1.8	3461.7	1	1.4	3656.4	0	0	0	2	3.3	89024
Q9I558	sp|Q9I558|ACSA1_PSEAE Acetyl-coenzyme A synthetase 1 OS=Pseudomonas aeruginosa (strain ATCC 15692 / DSM 22644 / CIP 104116 / JCM 14847 / LMG 12228 / 1C / PRS 101 / PAO1) GN=acsA1 PE=3 SV=1	71.762	25.094	1326600	0	0	0	4	12.6	505430	1	2.9	101340	2	4.5	669450
Q9I576	sp|Q9I576|HPPD_PSEAE 4-hydroxyphenylpyruvate dioxygenase OS=Pseudomonas aeruginosa (strain ATCC 15692 / DSM 22644 / CIP 104116 / JCM 14847 / LMG 12228 / 1C / PRS 101 / PAO1) GN=hpd PE=3 SV=1	39.912	94.773	5639000	0	0	0	5	19	622500	2	7.6	70263	4	15.7	1006300
Q9I585	tr|Q9I585|Q9I585_PSEAE Uncharacterized protein OS=Pseudomonas aeruginosa (strain ATCC 15692 / DSM 22644 / CIP 104116 / JCM 14847 / LMG 12228 / 1C / PRS 101 / PAO1) GN=PA0856 PE=1 SV=1	19.998	10.808	356580	0	0	0	1	6.6	23611	2	13.2	197220	1	6.6	28236
Q9I589	sp|Q9I589|CBPD_PSEAE Chitin-binding protein CbpD OS=Pseudomonas aeruginosa (strain ATCC 15692 / DSM 22644 / CIP 104116 / JCM 14847 / LMG 12228 / 1C / PRS 101 / PAO1) GN=cbpD PE=1 SV=1	41.916	4.4875	1633800	0	0	0	2	10.3	539030	0	0	0	2	10.3	522970
Q9I5E2	tr|Q9I5E2|Q9I5E2_PSEAE 2-methylisocitrate lyase OS=Pseudomonas aeruginosa (strain ATCC 15692 / DSM 22644 / CIP 104116 / JCM 14847 / LMG 12228 / 1C / PRS 101 / PAO1) GN=prpB PE=3 SV=1	32.137	1.3425	289000	0	0	0	1	12.4	178290	0	0	0	2	15.8	110720
Q9I5E3	tr|Q9I5E3|Q9I5E3_PSEAE Citrate synthase OS=Pseudomonas aeruginosa (strain ATCC 15692 / DSM 22644 / CIP 104116 / JCM 14847 / LMG 12228 / 1C / PRS 101 / PAO1) GN=prpC PE=3 SV=1	41.689	65.709	5260300	0	0	0	6	25.9	1085400	5	20	237650	5	19.7	2273900
Q9I5E4	tr|Q9I5E4|Q9I5E4_PSEAE Probable aconitate hydratase OS=Pseudomonas aeruginosa (strain ATCC 15692 / DSM 22644 / CIP 104116 / JCM 14847 / LMG 12228 / 1C / PRS 101 / PAO1) GN=PA0794 PE=4 SV=1	94.89	1.0468	4442.2	1	2	4442.2	0	0	0	0	0	0	0	0	0
Q9I5F6	tr|Q9I5F6|Q9I5F6_PSEAE Bifunctional protein PutA OS=Pseudomonas aeruginosa (strain ATCC 15692 / DSM 22644 / CIP 104116 / JCM 14847 / LMG 12228 / 1C / PRS 101 / PAO1) GN=putA PE=3 SV=1	115.63	40.901	2265600	1	1.4	928.46	8	11	417000	4	6.4	77421	10	13.6	1571300
Q9I5I4	tr|Q9I5I4|Q9I5I4_PSEAE Probable enoyl-CoA hydratase/isomerase OS=Pseudomonas aeruginosa (strain ATCC 15692 / DSM 22644 / CIP 104116 / JCM 14847 / LMG 12228 / 1C / PRS 101 / PAO1) GN=PA0745 PE=3 SV=1	29.904	1.1016	93366	0	0	0	0	0	0	0	0	0	0	0	0
Q9I5I5	tr|Q9I5I5|Q9I5I5_PSEAE Probable enoyl-CoA hydratase/isomerase OS=Pseudomonas aeruginosa (strain ATCC 15692 / DSM 22644 / CIP 104116 / JCM 14847 / LMG 12228 / 1C / PRS 101 / PAO1) GN=PA0744 PE=4 SV=1	40.589	5.4481	1609400	0	0	0	2	11.2	400050	0	0	0	3	13.9	867300
Q9I5I6	sp|Q9I5I6|SERDH_PSEAE NAD-dependent L-serine dehydrogenase OS=Pseudomonas aeruginosa (strain ATCC 15692 / DSM 22644 / CIP 104116 / JCM 14847 / LMG 12228 / 1C / PRS 101 / PAO1) GN=PA0743 PE=1 SV=1	30.754	5.5818	192360	0	0	0	1	9.1	113690	0	0	0	1	9.1	78667
Q9I5U1	tr|Q9I5U1|Q9I5U1_PSEAE Uncharacterized protein OS=Pseudomonas aeruginosa (strain ATCC 15692 / DSM 22644 / CIP 104116 / JCM 14847 / LMG 12228 / 1C / PRS 101 / PAO1) GN=PA0596 PE=4 SV=1	38.185	8.9842	1167400	0	0	0	2	13.6	417240	0	0	0	2	13.6	692900
Q9I5U9	tr|Q9I5U9|Q9I5U9_PSEAE Uncharacterized protein OS=Pseudomonas aeruginosa (strain ATCC 15692 / DSM 22644 / CIP 104116 / JCM 14847 / LMG 12228 / 1C / PRS 101 / PAO1) GN=PA0588 PE=4 SV=1	73.722	133.83	36509000	3	8.8	21537	18	39.8	8712100	14	31.2	929980	20	45.2	22297000
Q9I5V1	tr|Q9I5V1|Q9I5V1_PSEAE Uncharacterized protein OS=Pseudomonas aeruginosa (strain ATCC 15692 / DSM 22644 / CIP 104116 / JCM 14847 / LMG 12228 / 1C / PRS 101 / PAO1) GN=PA0586 PE=4 SV=1	60.814	13.234	2693000	0	0	0	3	10.6	1034000	1	2.9	35266	4	13	1623700
Q9I5V8	sp|Q9I5V8|RS21_PSEAE 30S ribosomal protein S21 OS=Pseudomonas aeruginosa (strain ATCC 15692 / DSM 22644 / CIP 104116 / JCM 14847 / LMG 12228 / 1C / PRS 101 / PAO1) GN=rpsU PE=1 SV=3	8.4848	3.9235	18857000	0	0	0	1	14.1	2696400	0	0	0	1	14.1	3812400
Q9I5X1	tr|Q9I5X1|Q9I5X1_PSEAE Alkyl hydroperoxide reductase AhpD OS=Pseudomonas aeruginosa (strain ATCC 15692 / DSM 22644 / CIP 104116 / JCM 14847 / LMG 12228 / 1C / PRS 101 / PAO1) GN=PA0565 PE=3 SV=1	11.759	3.3447	58629	1	25.9	58629	0	0	0	0	0	0	0	0	0
Q9I5Y1	sp|Q9I5Y1|ALF_PSEAE Fructose-bisphosphate aldolase OS=Pseudomonas aeruginosa (strain ATCC 15692 / DSM 22644 / CIP 104116 / JCM 14847 / LMG 12228 / 1C / PRS 101 / PAO1) GN=fba PE=3 SV=1	38.573	6.1185	2610300	0	0	0	2	9.6	315630	2	10.2	201340	3	13	1788500
Q9I5Y4	sp|Q9I5Y4|PGK_PSEAE Phosphoglycerate kinase OS=Pseudomonas aeruginosa (strain ATCC 15692 / DSM 22644 / CIP 104116 / JCM 14847 / LMG 12228 / 1C / PRS 101 / PAO1) GN=pgk PE=3 SV=1	40.404	6.9502	1648300	0	0	0	2	11.4	489990	1	4.4	71715	3	14.2	984550
Q9I5Y8	tr|Q9I5Y8|Q9I5Y8_PSEAE Transketolase OS=Pseudomonas aeruginosa (strain ATCC 15692 / DSM 22644 / CIP 104116 / JCM 14847 / LMG 12228 / 1C / PRS 101 / PAO1) GN=tktA PE=1 SV=1	72.219	7.1553	3261300	0	0	0	5	21.7	1110500	2	8.1	112390	5	18.6	1562100
Q9I5Z0	sp|Q9I5Z0|METK_PSEAE S-adenosylmethionine synthase OS=Pseudomonas aeruginosa (strain ATCC 15692 / DSM 22644 / CIP 104116 / JCM 14847 / LMG 12228 / 1C / PRS 101 / PAO1) GN=metK PE=3 SV=1	42.709	15.744	5000300	1	5.8	119660	4	18.9	2955400	1	5.8	39704	3	12.4	1299400
Q9I610	tr|Q9I610|Q9I610_PSEAE Probable acyl-CoA dehydrogenase OS=Pseudomonas aeruginosa (strain ATCC 15692 / DSM 22644 / CIP 104116 / JCM 14847 / LMG 12228 / 1C / PRS 101 / PAO1) GN=PA0508 PE=3 SV=1	63.628	3.3028	275100	0	0	0	2	6.1	175610	0	0	0	1	4.4	99493
Q9I611	tr|Q9I611|Q9I611_PSEAE Probable acyl-CoA dehydrogenase OS=Pseudomonas aeruginosa (strain ATCC 15692 / DSM 22644 / CIP 104116 / JCM 14847 / LMG 12228 / 1C / PRS 101 / PAO1) GN=PA0507 PE=3 SV=1	64.349	3.508	18017000	0	0	0	2	3.7	502080	1	1.8	779020	2	3.7	1604600
Q9I612	tr|Q9I612|Q9I612_PSEAE Probable acyl-CoA dehydrogenase OS=Pseudomonas aeruginosa (strain ATCC 15692 / DSM 22644 / CIP 104116 / JCM 14847 / LMG 12228 / 1C / PRS 101 / PAO1) GN=PA0506 PE=3 SV=1	65.358	22.602	4031900	1	3.8	12803	5	12.3	1014300	1	2	9249.3	7	16.8	1769400
Q9I625	tr|Q9I625|Q9I625_PSEAE Probable biotin-requiring enzyme OS=Pseudomonas aeruginosa (strain ATCC 15692 / DSM 22644 / CIP 104116 / JCM 14847 / LMG 12228 / 1C / PRS 101 / PAO1) GN=PA0493 PE=4 SV=1	8.5205	2.0518	298510000	1	18.3	89376	1	18.3	22238000	1	18.3	12229000	1	18.3	114550000
Q9I635	tr|Q9I635|Q9I635_PSEAE Probable acetyltransferase OS=Pseudomonas aeruginosa (strain ATCC 15692 / DSM 22644 / CIP 104116 / JCM 14847 / LMG 12228 / 1C / PRS 101 / PAO1) GN=PA0483 PE=4 SV=1	16.578	1.5252	847600	0	0	0	1	23.1	847600	0	0	0	0	0	0
Q9I636	sp|Q9I636|MASZ_PSEAE Malate synthase G OS=Pseudomonas aeruginosa (strain ATCC 15692 / DSM 22644 / CIP 104116 / JCM 14847 / LMG 12228 / 1C / PRS 101 / PAO1) GN=glcB PE=3 SV=1	78.659	44.518	8898200	1	2.9	3906.7	12	30.3	2537200	5	16.7	319550	12	30.2	4529600
Q9I659	tr|Q9I659|Q9I659_PSEAE Probable ClpA/B protease ATP binding subunit OS=Pseudomonas aeruginosa (strain ATCC 15692 / DSM 22644 / CIP 104116 / JCM 14847 / LMG 12228 / 1C / PRS 101 / PAO1) GN=PA0459 PE=4 SV=1	94.174	60.04	12940000	1	2.6	28413	21	38.4	4753500	13	23.3	436930	20	37.8	5533300
Q9I671	tr|Q9I671|Q9I671_PSEAE Glutaryl-CoA dehydrogenase OS=Pseudomonas aeruginosa (strain ATCC 15692 / DSM 22644 / CIP 104116 / JCM 14847 / LMG 12228 / 1C / PRS 101 / PAO1) GN=gcdH PE=3 SV=1	43.311	110.17	18555000	3	14.5	80685	8	39.9	5371200	5	25.4	457850	9	42.2	10393000
Q9I672	tr|Q9I672|Q9I672_PSEAE Uncharacterized protein OS=Pseudomonas aeruginosa (strain ATCC 15692 / DSM 22644 / CIP 104116 / JCM 14847 / LMG 12228 / 1C / PRS 101 / PAO1) GN=PA0446 PE=4 SV=1	43.846	118.31	50945000	2	8.8	15341	17	72.2	28660000	3	15.2	205260	17	72.2	20834000
Q9I685	sp|Q9I685|SAHH_PSEAE Adenosylhomocysteinase OS=Pseudomonas aeruginosa (strain ATCC 15692 / DSM 22644 / CIP 104116 / JCM 14847 / LMG 12228 / 1C / PRS 101 / PAO1) GN=ahcY PE=3 SV=1	51.399	35.606	14737000	2	6.6	11995	11	33	3574700	8	21.5	413740	12	36	6571400
Q9I687	tr|Q9I687|Q9I687_PSEAE Methylenetetrahydrofolate reductase OS=Pseudomonas aeruginosa (strain ATCC 15692 / DSM 22644 / CIP 104116 / JCM 14847 / LMG 12228 / 1C / PRS 101 / PAO1) GN=metF PE=3 SV=1	32.228	4.0959	1361400	0	0	0	1	8.6	512070	0	0	0	1	8.6	700030
Q9I688	tr|Q9I688|Q9I688_PSEAE Uncharacterized protein OS=Pseudomonas aeruginosa (strain ATCC 15692 / DSM 22644 / CIP 104116 / JCM 14847 / LMG 12228 / 1C / PRS 101 / PAO1) GN=PA0429 PE=4 SV=1	40.872	3.8262	1538000	0	0	0	2	12.4	554290	0	0	0	2	12.4	861310
Q9I689	tr|Q9I689|Q9I689_PSEAE ATP-dependent RNA helicase RhlE OS=Pseudomonas aeruginosa (strain ATCC 15692 / DSM 22644 / CIP 104116 / JCM 14847 / LMG 12228 / 1C / PRS 101 / PAO1) GN=rhlE PE=3 SV=1	70.111	13.138	146340	0	0	0	1	2.5	10927	1	2.5	2336.4	1	2.5	58629
Q9I6A0	tr|Q9I6A0|Q9I6A0_PSEAE Probable cystathionine gamma-lyase OS=Pseudomonas aeruginosa (strain ATCC 15692 / DSM 22644 / CIP 104116 / JCM 14847 / LMG 12228 / 1C / PRS 101 / PAO1) GN=PA0400 PE=3 SV=1	42.786	33.522	3326500	0	0	0	3	16.2	1528300	2	10.9	405770	3	16.2	945410
Q9I6E0	sp|Q9I6E0|ILVD_PSEAE Dihydroxy-acid dehydratase OS=Pseudomonas aeruginosa (strain ATCC 15692 / DSM 22644 / CIP 104116 / JCM 14847 / LMG 12228 / 1C / PRS 101 / PAO1) GN=ilvD PE=3 SV=1	65.159	3.5709	548830	0	0	0	1	2.1	256200	0	0	0	1	2.1	292630
Q9I6E4	tr|Q9I6E4|Q9I6E4_PSEAE Uncharacterized protein OS=Pseudomonas aeruginosa (strain ATCC 15692 / DSM 22644 / CIP 104116 / JCM 14847 / LMG 12228 / 1C / PRS 101 / PAO1) GN=PA0349 PE=4 SV=1	37.843	-2	0	0	0	0	0	0	0	0	0	0	0	0	0
Q9I6F2	sp|Q9I6F2|LGT_PSEAE Prolipoprotein diacylglyceryl transferase OS=Pseudomonas aeruginosa (strain ATCC 15692 / DSM 22644 / CIP 104116 / JCM 14847 / LMG 12228 / 1C / PRS 101 / PAO1) GN=lgt PE=3 SV=1	29.847	0.99274	282560	0	0	0	1	7.9	282560	0	0	0	0	0	0
Q9I6H4	tr|Q9I6H4|Q9I6H4_PSEAE Uncharacterized protein OS=Pseudomonas aeruginosa (strain ATCC 15692 / DSM 22644 / CIP 104116 / JCM 14847 / LMG 12228 / 1C / PRS 101 / PAO1) GN=PA0317 PE=4 SV=1	51.286	3.4714	306250	0	0	0	2	4.5	66151	0	0	0	2	4.5	189280
Q9I6H5	tr|Q9I6H5|Q9I6H5_PSEAE D-3-phosphoglycerate dehydrogenase OS=Pseudomonas aeruginosa (strain ATCC 15692 / DSM 22644 / CIP 104116 / JCM 14847 / LMG 12228 / 1C / PRS 101 / PAO1) GN=serA PE=3 SV=1	44.216	10.919	4105300	0	0	0	3	9.5	904850	1	3.7	70449	4	12.2	1977500
Q9I6J0	sp|Q9I6J0|SPUE_PSEAE Spermidine-binding periplasmic protein SpuE OS=Pseudomonas aeruginosa (strain ATCC 15692 / DSM 22644 / CIP 104116 / JCM 14847 / LMG 12228 / 1C / PRS 101 / PAO1) GN=spuE PE=1 SV=1	40.069	6.0529	449090	0	0	0	0	0	0	3	15.6	449090	0	0	0
Q9I6J1	sp|Q9I6J1|SPUD_PSEAE Putrescine-binding periplasmic protein SpuD OS=Pseudomonas aeruginosa (strain ATCC 15692 / DSM 22644 / CIP 104116 / JCM 14847 / LMG 12228 / 1C / PRS 101 / PAO1) GN=spuD PE=1 SV=1	40.629	19.213	2265800	0	0	0	3	14.2	501400	5	20.4	1371600	1	6.3	323000
Q9I6J2	tr|Q9I6J2|Q9I6J2_PSEAE Putrescine aminotransferase OS=Pseudomonas aeruginosa (strain ATCC 15692 / DSM 22644 / CIP 104116 / JCM 14847 / LMG 12228 / 1C / PRS 101 / PAO1) GN=spuC PE=3 SV=1	50.452	27.499	9383700	0	0	0	7	34.9	3535300	2	12.1	195270	7	34.9	4762900
Q9I6J3	tr|Q9I6J3|Q9I6J3_PSEAE Probable glutamine synthetase OS=Pseudomonas aeruginosa (strain ATCC 15692 / DSM 22644 / CIP 104116 / JCM 14847 / LMG 12228 / 1C / PRS 101 / PAO1) GN=spuB PE=3 SV=1	50.965	6.1984	169080	0	0	0	1	7.5	94023	0	0	0	1	7.5	75061
Q9I6M1	tr|Q9I6M1|Q9I6M1_PSEAE Alkyl hydroperoxide reductase AhpD OS=Pseudomonas aeruginosa (strain ATCC 15692 / DSM 22644 / CIP 104116 / JCM 14847 / LMG 12228 / 1C / PRS 101 / PAO1) GN=PA0269 PE=1 SV=1	16.202	3.4697	866760	0	0	0	0	0	0	0	0	0	0	0	0
Q9I6M4	sp|Q9I6M4|DAVT_PSEAE 5-aminovalerate aminotransferase DavT OS=Pseudomonas aeruginosa (strain ATCC 15692 / DSM 22644 / CIP 104116 / JCM 14847 / LMG 12228 / 1C / PRS 101 / PAO1) GN=davT PE=1 SV=1	45.22	29.188	9045600	0	0	0	7	30.8	2673200	2	9.9	106530	8	34	4603000
Q9I6M5	sp|Q9I6M5|DAVD_PSEAE Glutarate-semialdehyde dehydrogenase DavD OS=Pseudomonas aeruginosa (strain ATCC 15692 / DSM 22644 / CIP 104116 / JCM 14847 / LMG 12228 / 1C / PRS 101 / PAO1) GN=davD PE=1 SV=1	51.622	24.266	2668300	1	5	18153	3	13	1223000	0	0	0	3	13	1211900
Q9I6T6	tr|Q9I6T6|Q9I6T6_PSEAE Probable amidase OS=Pseudomonas aeruginosa (strain ATCC 15692 / DSM 22644 / CIP 104116 / JCM 14847 / LMG 12228 / 1C / PRS 101 / PAO1) GN=PA0202 PE=4 SV=1	53.473	-2	0	0	0	0	0	0	0	0	0	0	1	3.7	0
Q9I6V6	tr|Q9I6V6|Q9I6V6_PSEAE Aerotaxis transducer Aer2 OS=Pseudomonas aeruginosa (strain ATCC 15692 / DSM 22644 / CIP 104116 / JCM 14847 / LMG 12228 / 1C / PRS 101 / PAO1) GN=aer2 PE=1 SV=1	72.59	1.0961	713910	0	0	0	0	0	0	0	0	0	0	0	0
Q9I6Z1	tr|Q9I6Z1|Q9I6Z1_PSEAE Uncharacterized protein OS=Pseudomonas aeruginosa (strain ATCC 15692 / DSM 22644 / CIP 104116 / JCM 14847 / LMG 12228 / 1C / PRS 101 / PAO1) GN=PA0141 PE=4 SV=1	34.463	22.594	14214000	0	0	0	7	30.5	3770600	3	14.4	525540	7	30.5	8107700
Q9I6Z3	tr|Q9I6Z3|Q9I6Z3_PSEAE Alkyl hydroperoxide reductase subunit C OS=Pseudomonas aeruginosa (strain ATCC 15692 / DSM 22644 / CIP 104116 / JCM 14847 / LMG 12228 / 1C / PRS 101 / PAO1) GN=ahpC PE=4 SV=1	20.541	23.852	52137000	0	0	0	7	54	16083000	8	54	6725300	7	54	18868000
Q9I710	tr|Q9I710|Q9I710_PSEAE Uncharacterized protein OS=Pseudomonas aeruginosa (strain ATCC 15692 / DSM 22644 / CIP 104116 / JCM 14847 / LMG 12228 / 1C / PRS 101 / PAO1) GN=PA0122 PE=4 SV=1	14.579	2.0868	472170	0	0	0	0	0	0	0	0	0	0	0	0
Q9I742	sp|Q9I742|CLPV1_PSEAE Protein ClpV1 OS=Pseudomonas aeruginosa (strain ATCC 15692 / DSM 22644 / CIP 104116 / JCM 14847 / LMG 12228 / 1C / PRS 101 / PAO1) GN=clpV1 PE=1 SV=1	98.737	36.827	3240100	0	0	0	10	15.4	1179400	1	1.8	15691	11	16.6	1937400
Q9I747	sp|Q9I747|HCP1_PSEAE Protein hcp1 OS=Pseudomonas aeruginosa (strain ATCC 15692 / DSM 22644 / CIP 104116 / JCM 14847 / LMG 12228 / 1C / PRS 101 / PAO1) GN=hcp1 PE=1 SV=1	17.414	3.9711	4567300	0	0	0	2	16.7	846860	2	16.7	408480	2	16.7	2291000
Q9I748	tr|Q9I748|Q9I748_PSEAE Uncharacterized protein OS=Pseudomonas aeruginosa (strain ATCC 15692 / DSM 22644 / CIP 104116 / JCM 14847 / LMG 12228 / 1C / PRS 101 / PAO1) GN=PA0084 PE=4 SV=1	55.771	24.699	8070400	1	3.2	9079.4	6	21.1	1443200	2	4.6	131760	8	32.1	6357500
Q9I765	tr|Q9I765|Q9I765_PSEAE Oligopeptidase A OS=Pseudomonas aeruginosa (strain ATCC 15692 / DSM 22644 / CIP 104116 / JCM 14847 / LMG 12228 / 1C / PRS 101 / PAO1) GN=prlC PE=3 SV=1	76.043	26.567	1283300	1	2.9	15889	4	6.6	359590	0	0	0	4	7.9	907790
Q9I767	sp|Q9I767|5NTD_PSEAE 5-nucleotidase OS=Pseudomonas aeruginosa (strain ATCC 15692 / DSM 22644 / CIP 104116 / JCM 14847 / LMG 12228 / 1C / PRS 101 / PAO1) GN=PA0065 PE=1 SV=1	24.951	2.5517	329810	0	0	0	1	6.8	149420	0	0	0	1	6.8	180380
Q9I768	tr|Q9I768|Q9I768_PSEAE Uncharacterized protein OS=Pseudomonas aeruginosa (strain ATCC 15692 / DSM 22644 / CIP 104116 / JCM 14847 / LMG 12228 / 1C / PRS 101 / PAO1) GN=PA0064 PE=4 SV=1	35.493	2.5676	1582700	0	0	0	1	5.2	677050	0	0	0	1	5.2	905680
Q9I7B7	sp|Q9I7B7|SYGA_PSEAE Glycine--tRNA ligase alpha subunit OS=Pseudomonas aeruginosa (strain ATCC 15692 / DSM 22644 / CIP 104116 / JCM 14847 / LMG 12228 / 1C / PRS 101 / PAO1) GN=glyQ PE=3 SV=1	36.14	2.8305	1653600	0	0	0	2	9.5	630010	0	0	0	2	9.5	842260
Q9I7B8	sp|Q9I7B8|SYGB_PSEAE Glycine--tRNA ligase beta subunit OS=Pseudomonas aeruginosa (strain ATCC 15692 / DSM 22644 / CIP 104116 / JCM 14847 / LMG 12228 / 1C / PRS 101 / PAO1) GN=glyS PE=3 SV=1	73.973	8.8501	252280	1	2	4579.2	1	2.2	104890	0	0	0	1	2.2	114940
Q9I7C2	sp|Q9I7C2|GYRB_PSEAE DNA gyrase subunit B OS=Pseudomonas aeruginosa (strain ATCC 15692 / DSM 22644 / CIP 104116 / JCM 14847 / LMG 12228 / 1C / PRS 101 / PAO1) GN=gyrB PE=3 SV=1	90.188	41.731	3169200	0	0	0	6	15.6	1710500	0	0	0	5	13.9	1440700
Q9I7C4	sp|Q9I7C4|DPO3B_PSEAE DNA polymerase III subunit beta OS=Pseudomonas aeruginosa (strain ATCC 15692 / DSM 22644 / CIP 104116 / JCM 14847 / LMG 12228 / 1C / PRS 101 / PAO1) GN=dnaN PE=3 SV=1	40.694	19.078	7958600	0	0	0	4	14.4	1712300	2	7.1	159360	5	17.4	2826500
Q9I7C5	sp|Q9I7C5|DNAA_PSEAE Chromosomal replication initiator protein DnaA OS=Pseudomonas aeruginosa (strain ATCC 15692 / DSM 22644 / CIP 104116 / JCM 14847 / LMG 12228 / 1C / PRS 101 / PAO1) GN=dnaA PE=3 SV=1	57.754	2.6431	204340	1	2.9	6733.2	1	2.9	197610	0	0	0	0	0	0
Q9LCT3	sp|Q9LCT3|SECA_PSEAE Protein translocase subunit SecA OS=Pseudomonas aeruginosa (strain ATCC 15692 / DSM 22644 / CIP 104116 / JCM 14847 / LMG 12228 / 1C / PRS 101 / PAO1) GN=secA PE=3 SV=1	103.85	5.2282	905210	1	2.2	3641.9	3	4.8	407430	1	1.3	10050	4	6.1	426330
Q9LCT6	sp|Q9LCT6|DDLB_PSEAE D-alanine--D-alanine ligase B OS=Pseudomonas aeruginosa (strain ATCC 15692 / DSM 22644 / CIP 104116 / JCM 14847 / LMG 12228 / 1C / PRS 101 / PAO1) GN=ddlB PE=3 SV=1	34.363	7.5321	386210	0	0	0	1	5.6	172940	1	5.6	70340	1	5.6	142930
Q9S508	sp|Q9S508|PHZB2_PSEAE Phenazine biosynthesis protein PhzB 2 OS=Pseudomonas aeruginosa (strain ATCC 15692 / DSM 22644 / CIP 104116 / JCM 14847 / LMG 12228 / 1C / PRS 101 / PAO1) GN=phzB2 PE=1 SV=1	19.027	4.9401	21658000	1	14.8	21706	3	40.7	8380900	0	0	0	3	40.7	11191000
Q9S646	sp|Q9S646|PPK_PSEAE Polyphosphate kinase OS=Pseudomonas aeruginosa (strain ATCC 15692 / DSM 22644 / CIP 104116 / JCM 14847 / LMG 12228 / 1C / PRS 101 / PAO1) GN=ppk PE=3 SV=1	78.292	6.0849	1706700	1	1.3	0	3	7.4	1193800	1	1.6	4572.6	1	3.5	320590
Q9X2T1	sp|Q9X2T1|THIO_PSEAE Thioredoxin OS=Pseudomonas aeruginosa (strain ATCC 15692 / DSM 22644 / CIP 104116 / JCM 14847 / LMG 12228 / 1C / PRS 101 / PAO1) GN=trxA PE=3 SV=1	11.87	5.0721	5261600	0	0	0	1	11.1	136960	1	10.2	237860	2	21.3	3270300
Q9X4G0	sp|Q9X4G0|HGD_PSEAE Homogentisate 1,2-dioxygenase OS=Pseudomonas aeruginosa (strain ATCC 15692 / DSM 22644 / CIP 104116 / JCM 14847 / LMG 12228 / 1C / PRS 101 / PAO1) GN=hmgA PE=3 SV=2	47.841	5.1297	779230	0	0	0	1	4.4	270700	0	0	0	1	4.4	403100
Q9Z9H0	sp|Q9Z9H0|GLND_PSEAE Bifunctional uridylyltransferase/uridylyl-removing enzyme OS=Pseudomonas aeruginosa (strain ATCC 15692 / DSM 22644 / CIP 104116 / JCM 14847 / LMG 12228 / 1C / PRS 101 / PAO1) GN=glnD PE=3 SV=2	103.4	-2	443620	0	0	0	0	0	0	0	0	0	1	3.2	443620
REV__Q9HWX6	sp|Q9HWX6|NUSB_PSEAE N utilization substance protein B homolog OS=Pseudomonas aeruginosa (strain ATCC 15692 / DSM 22644 / CIP 104116 / JCM 14847 / LMG 12228 / 1C / PRS 101 / PAO1) GN=nusB PE=3 SV=1	17.707	2.2453	NaN	0	0	NaN	0	0	NaN	1	0	NaN	0	0	NaN
REV__Q9HXW2	tr|Q9HXW2|Q9HXW2_PSEAE Probable transcriptional regulator OS=Pseudomonas aeruginosa (strain ATCC 15692 / DSM 22644 / CIP 104116 / JCM 14847 / LMG 12228 / 1C / PRS 101 / PAO1) GN=PA3678 PE=4 SV=1	23.15	1.1185	NaN	1	0	NaN	1	0	NaN	1	0	NaN	0	0	NaN
REV__Q9HY24	tr|Q9HY24|Q9HY24_PSEAE Uncharacterized protein OS=Pseudomonas aeruginosa (strain ATCC 15692 / DSM 22644 / CIP 104116 / JCM 14847 / LMG 12228 / 1C / PRS 101 / PAO1) GN=PA3602 PE=3 SV=1	58.786	-2	NaN	1	0	NaN	1	0	NaN	1	0	NaN	1	0	NaN
REV__Q9I2K2	tr|Q9I2K2|Q9I2K2_PSEAE Uncharacterized protein OS=Pseudomonas aeruginosa (strain ATCC 15692 / DSM 22644 / CIP 104116 / JCM 14847 / LMG 12228 / 1C / PRS 101 / PAO1) GN=PA1895 PE=4 SV=1	49.633	1.2698	NaN	0	0	NaN	0	0	NaN	1	0	NaN	0	0	NaN
REV__Q9I5U8	sp|Q9I5U8|GLPE_PSEAE Thiosulfate sulfurtransferase GlpE OS=Pseudomonas aeruginosa (strain ATCC 15692 / DSM 22644 / CIP 104116 / JCM 14847 / LMG 12228 / 1C / PRS 101 / PAO1) GN=glpE PE=3 SV=1	11.963	1.1092	NaN	0	0	NaN	1	0	NaN	1	0	NaN	1	0	NaN
